# Supplementary material
Source: PubMed Central journal article supplement (PMC10989773)
Supplement: MLF2-1-183-s001.pdf [file MLF2-1-183-s001.pdf]

## Supplementary figures

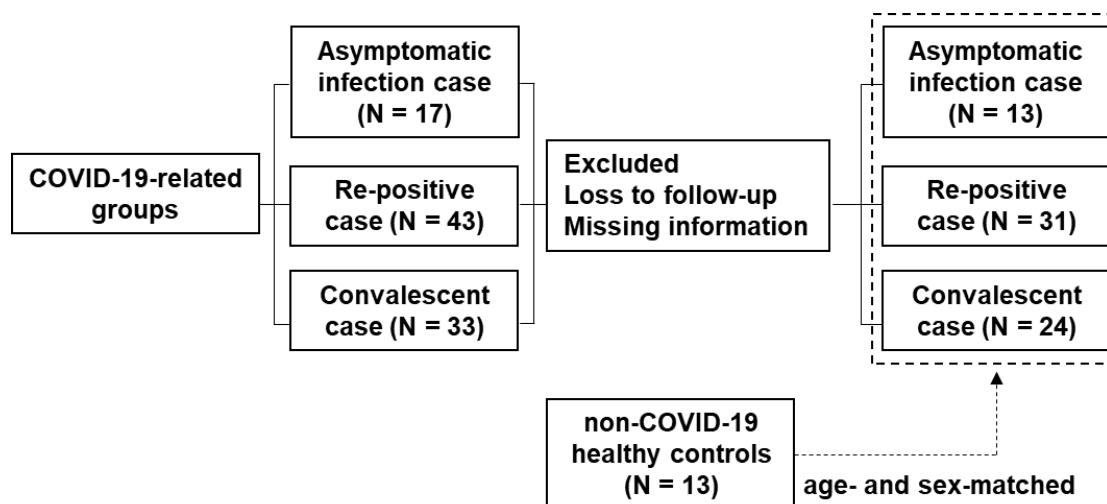

Figure S1 Schematic drawing of the volunteers recruitment

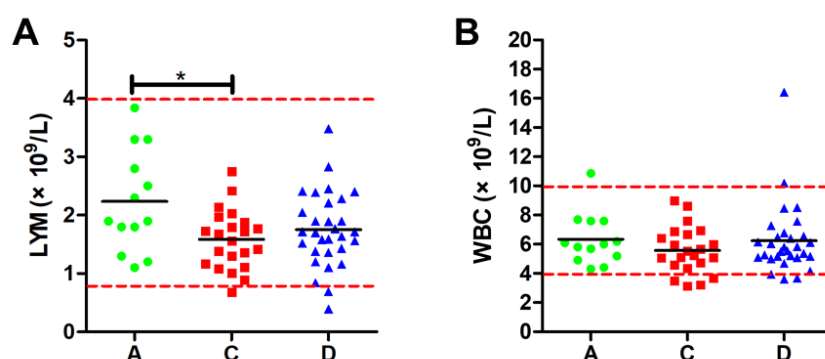

Figure S2 The counts of lymphocyte (LYM) and white blood cell (WBC) in the blood of patients in group A, C and D.

(A) The counts of LYM in the blood of patients in group A (N = 13), C (N = 22) and D (N = 30). The normal reference value is 0.8-4 ( $\times 10^9/L$ ) as the red line shown. There was one case and two cases lower than the normal reference value in group C and D, respectively. (B) The counts of WBC in the blood of patients in group A (N = 13), C (N = 22) and D (N = 30). The normal reference value is 4-10 ( $\times 10^9/L$ ) as the red line shown. One case in group A was higher than the normal reference value, and four cases in group C were lower than the normal reference value. Two cases were higher while three cases were lower than the normal reference value. One-way ANOVA with the least significant difference (LSD) test was used to analyze differences among the groups. Data were shown as mean. \* $p < 0.05$ .

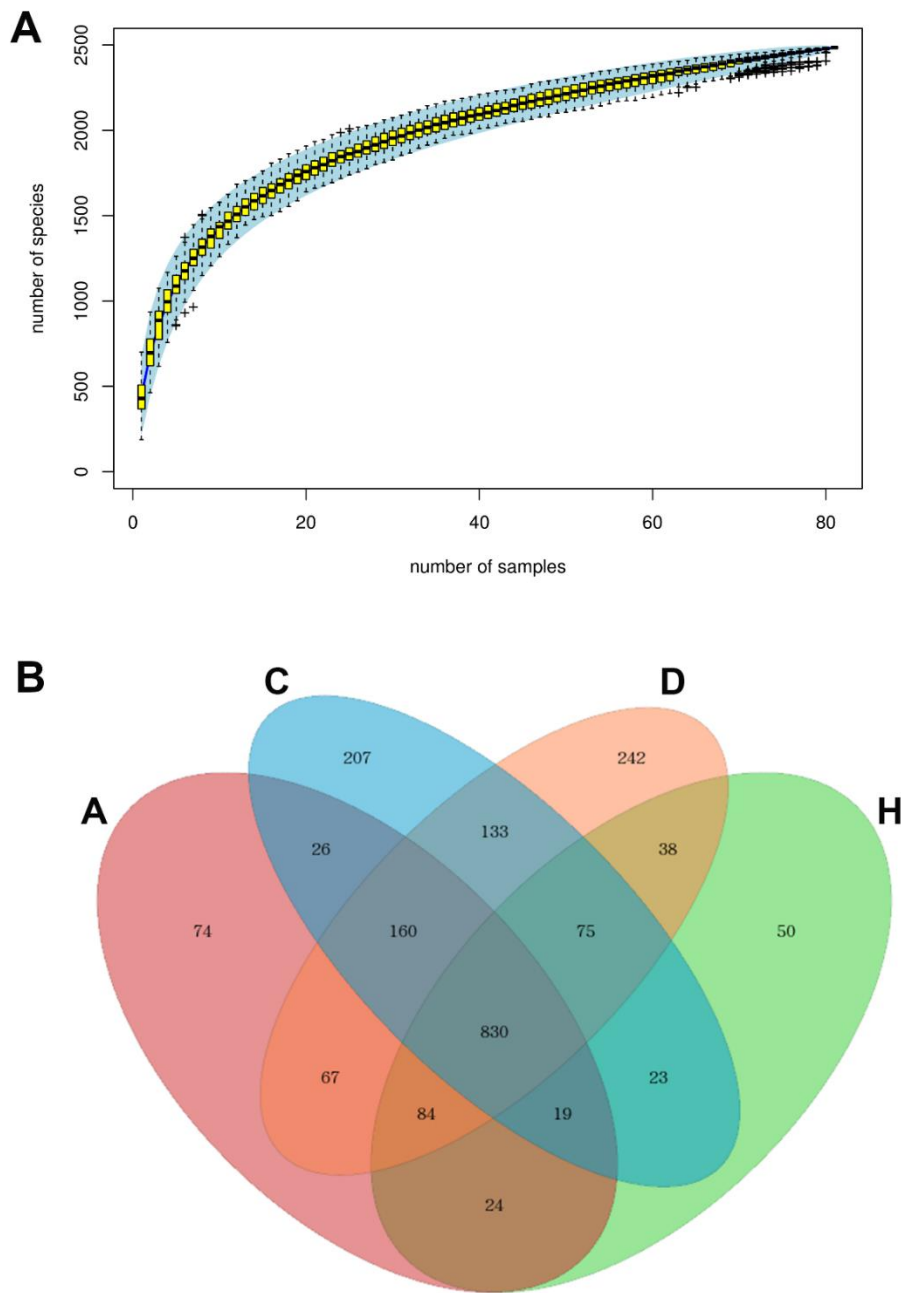

**Figure S3 Species accumulation curves and Venn diagram of the number of shared species in groups**

(A) Species accumulation curves. The plot showed that adding a new sample increased a few new microbial species to the dataset, indicating the sampling size and sequencing depth were sufficient to represent the overall gut microbial diversity. (B) The venn diagram showed 830 species were shared to all groups, while 74, 207, 242 and 50 species were unique to the group A, C, D and H, respectively.

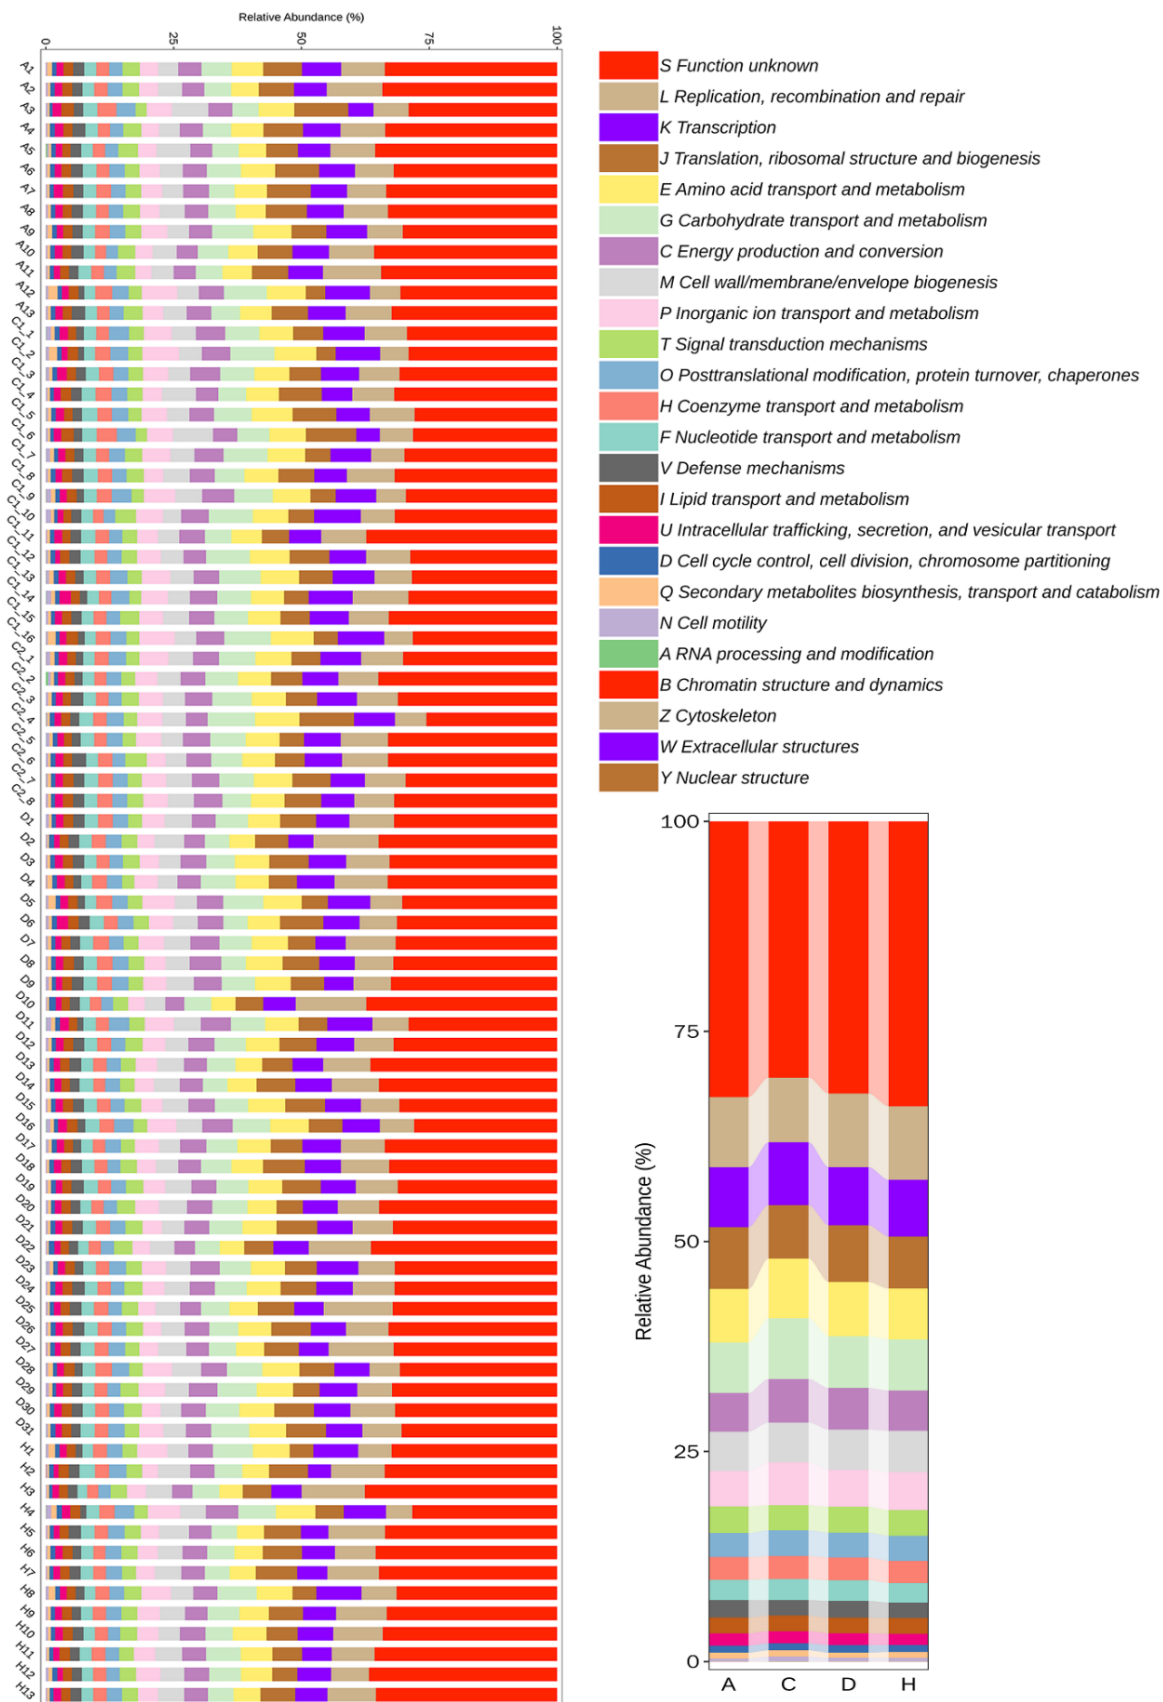

**Figure S4** The profile of bacterial orthologous groups based on eggNOG annotations

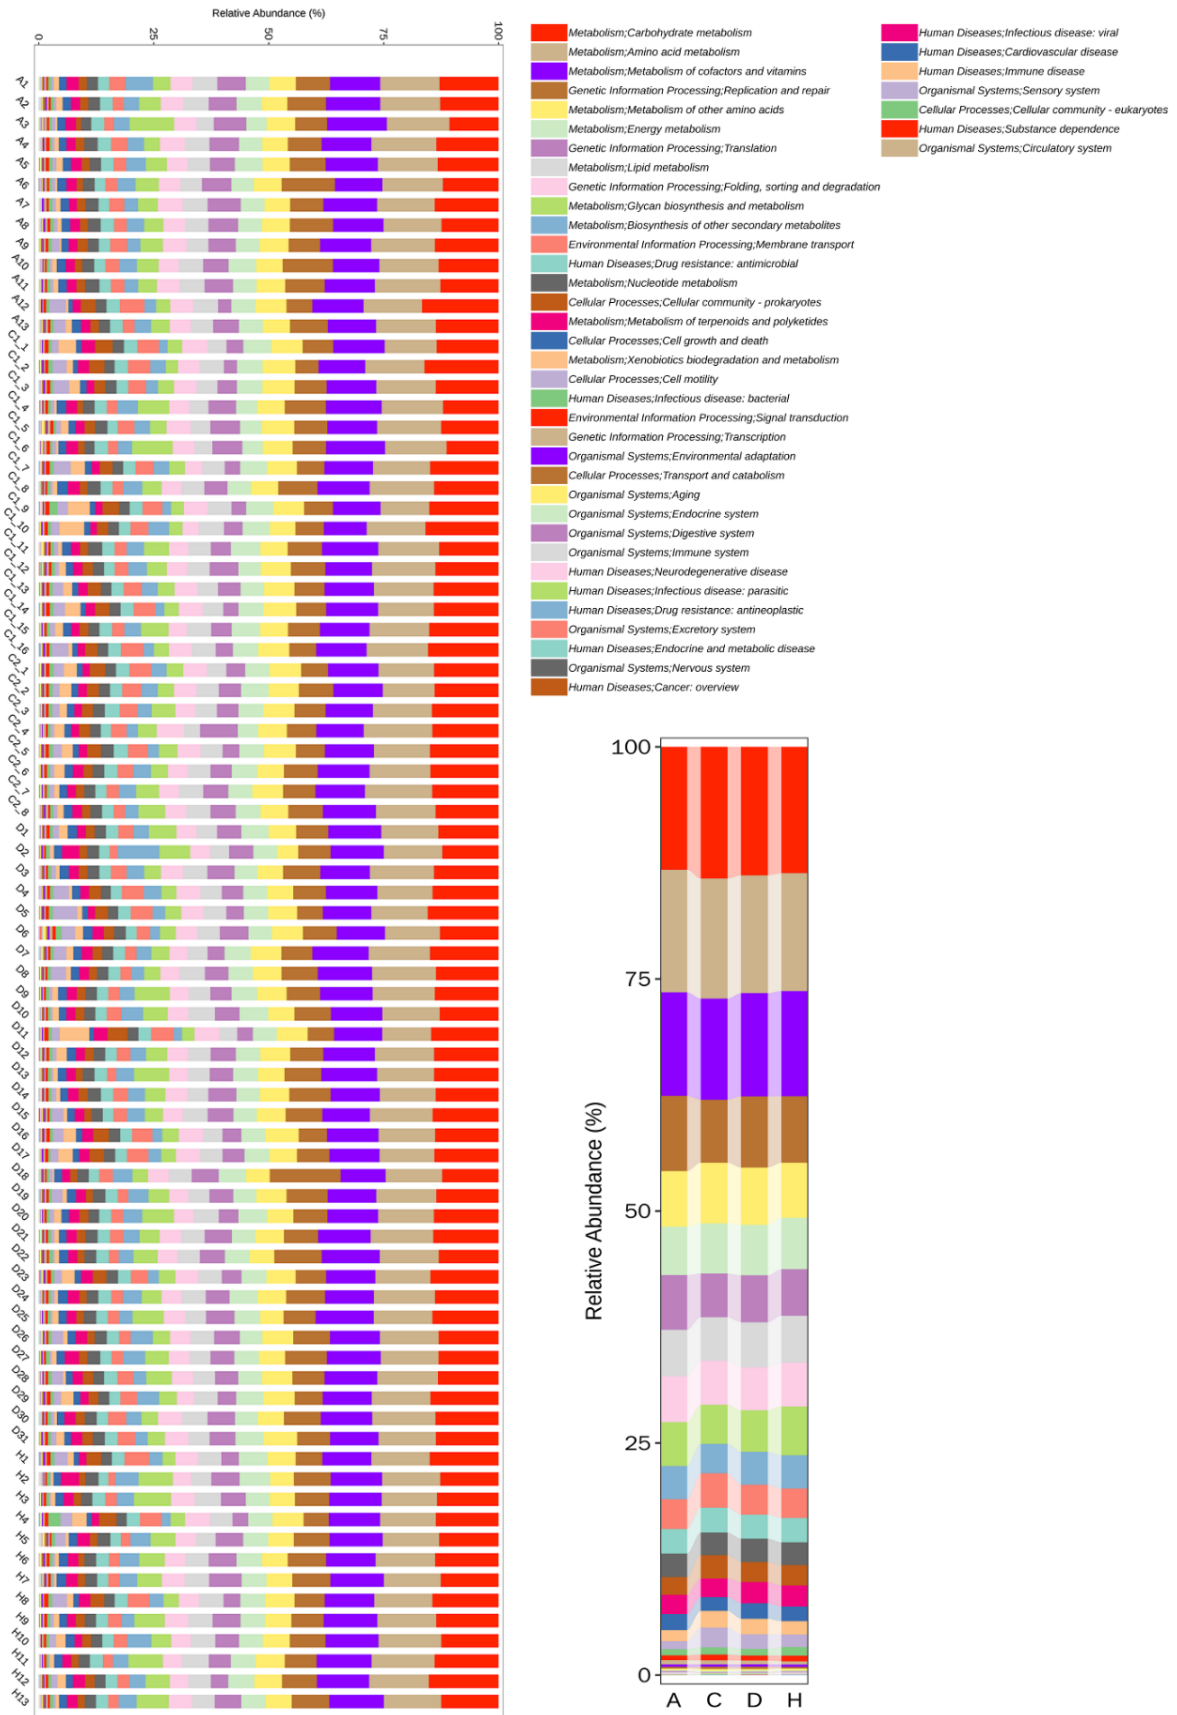

Figure S5 The profile of bacterial metabolic pathway based on KO annotations

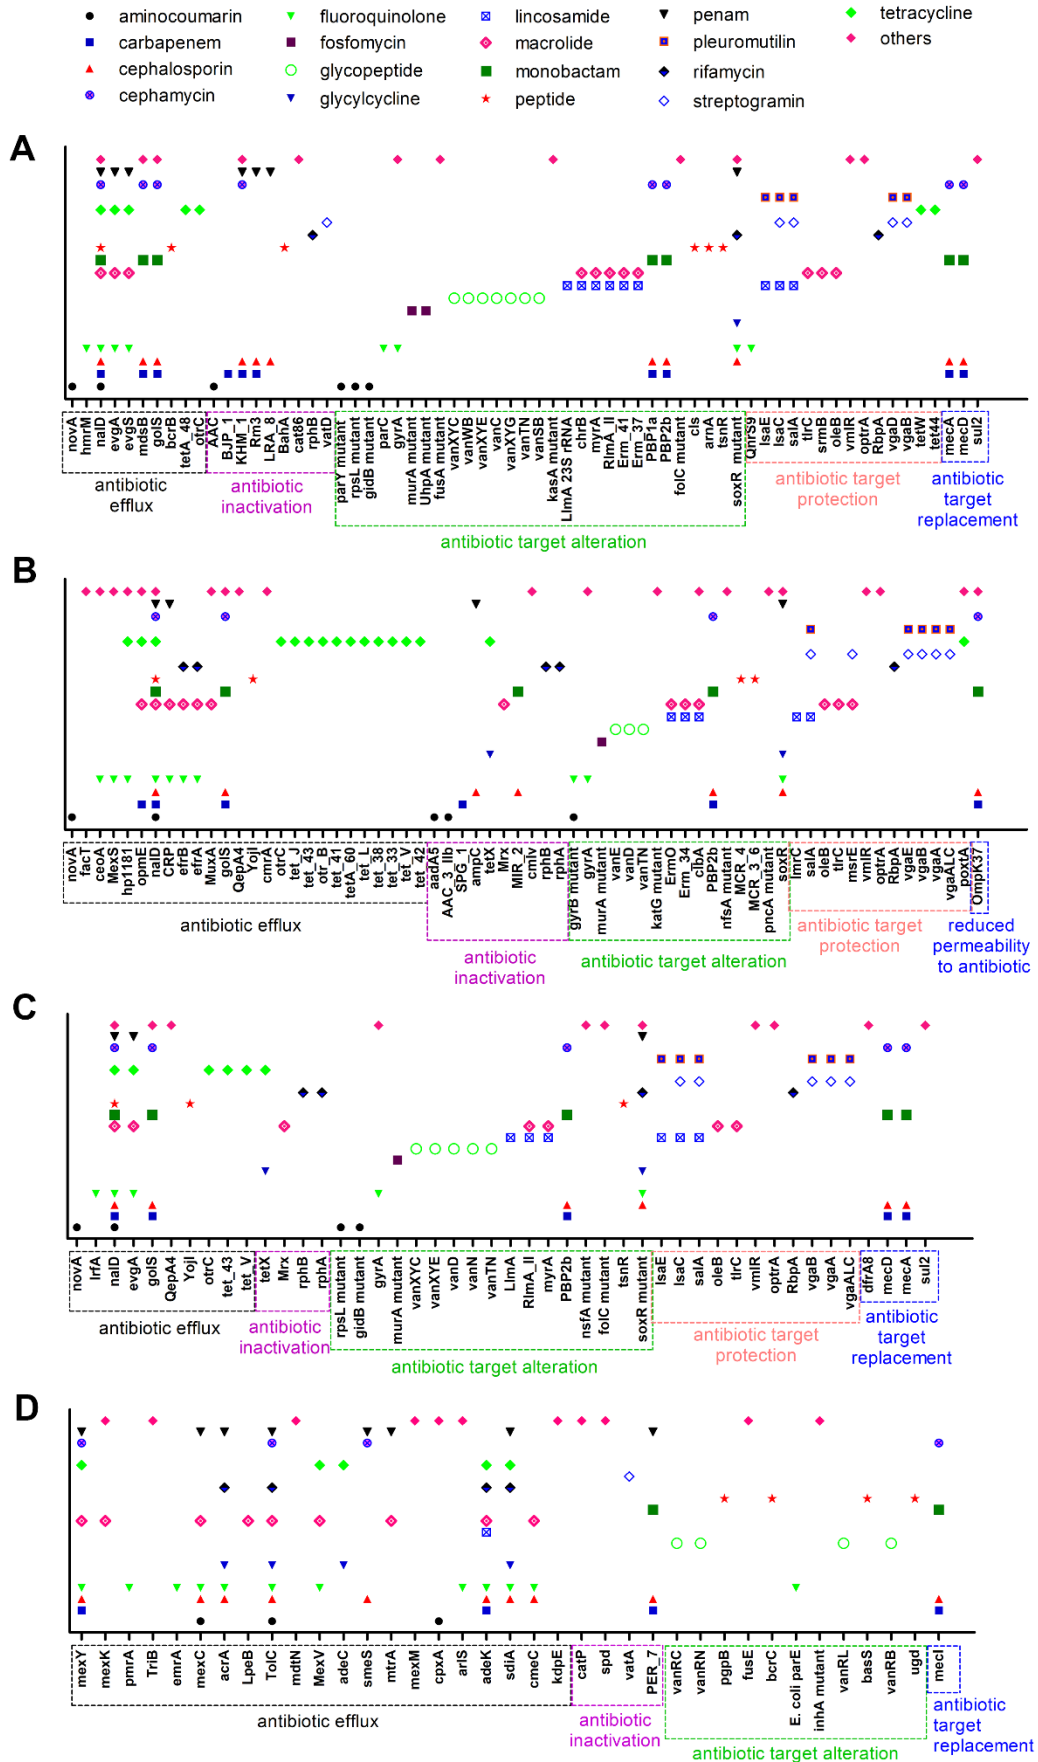

Figure S6 The enriched resistance genes of gut microbiota in COVID-19-related groups

(A) In group A, 67 resistance genes were mainly related to cephalosporin resistance (11), macrolide resistance (11), carbapenem resistance (10), lincosamide resistance (9), fluoroquinolone resistance (8) and cephamycin resistance (8). (B) In group C, 66 antibiotic resistance genes were mainly related to tetracycline resistance (16), macrolide resistance (13), fluoroquinolone resistance (10), cephalosporin resistance (7), carbapenem resistance (6) and streptogramin resistance (6). (C) In group D, 46 antibiotic resistance genes were mainly related to macrolide resistance (7), cephalosporin resistance (6), lincosamide resistance (6), tetracycline resistance (6), pleuromutilin resistance (6). (D) In group H, 37 antibiotic resistance genes were mainly related to fluoroquinolone resistance (12), cephalosporin resistance (10), macrolide resistance (9) and penam resistance (8).

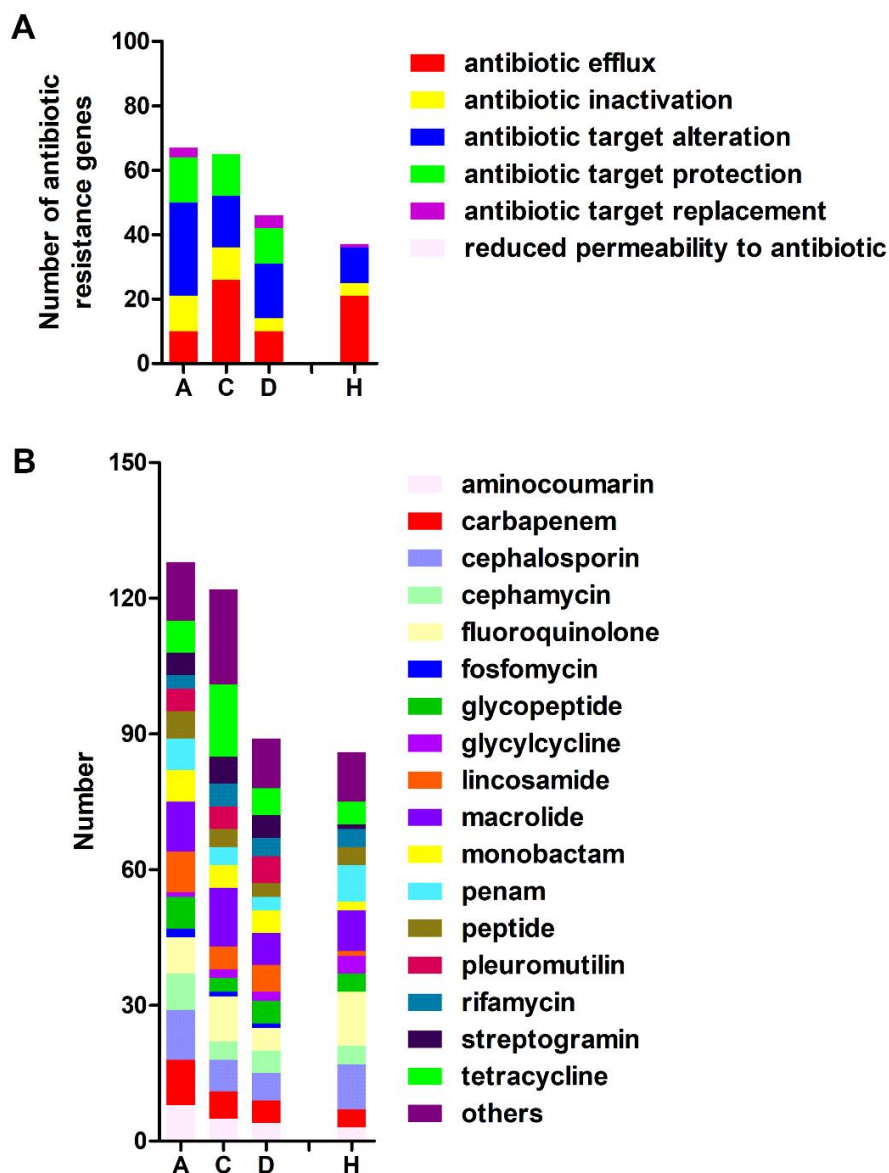

**Figure S7 The resistance mechanism and resistant spectrum of resistance genes in COVID-19-related groups**

(A) The resistance mechanism of the resistance genes in group A, C, D and H. (B) The resistant spectrum of the resistance genes in group A, C D and H.

## Supplementary tables

Table S1 Enriched species in groups using LEfSe analysis

| Abundance | Group | LDA_score | P value  | Species                                 |
|-----------|-------|-----------|----------|-----------------------------------------|
| 4.839998  | A     | 4.443891  | 0.039843 | s__Akkermansia_muciniphila              |
| 3.754537  | A     | 3.572035  | 0.03227  | s__Bacteroides_intestinalis             |
| 4.429785  | A     | 4.09647   | 0.002279 | s__Bifidobacterium_longum               |
| 3.950202  | A     | 3.658459  | 0.000246 | s__Blautia_obeum                        |
| 2.369887  | A     | 3.1962    | 0.019203 | s__Blautia_sp_AF19_10LB                 |
| 3.244315  | A     | 3.032211  | 0.015762 | s__Blautia_sp_OM05_6                    |
| 2.733603  | A     | 3.206317  | 0.020064 | s__Butyricicoccus_sp_OM06_6AC           |
| 2.44805   | A     | 3.08765   | 0.015762 | s__Collinsella_sp_AF15_51               |
| 3.01922   | A     | 3.116847  | 0.015432 | s__Collinsella_sp_AF37_9                |
| 3.083677  | A     | 3.028075  | 0.043054 | s__Collinsella_sp_AM34_10               |
| 3.566745  | A     | 3.269161  | 0.014855 | s__Dorea_formicigenerans                |
| 3.837781  | A     | 3.426499  | 0.03332  | s__Dorea_longicatena                    |
| 3.582947  | A     | 3.297046  | 0.004546 | s__Eubacterium_ramulus                  |
| 2.908623  | A     | 3.015892  | 0.013272 | s__Eubacterium_ventriosum               |
| 4.886772  | A     | 4.53395   | 0.001611 | s__Faecalibacterium_prausnitzii         |
| 3.791094  | A     | 3.448626  | 0.013911 | s__Faecalibacterium_sp_AF10_46          |
| 3.772427  | A     | 3.416373  | 0.041563 | s__Faecalibacterium_sp_AF27_11BH        |
| 4.323421  | A     | 3.998531  | 0.006068 | s__Gemmiger_formicilis                  |
| 2.453205  | A     | 3.102193  | 0.030426 | s__Gordonibacter_pamelaeae              |
| 2.499457  | A     | 3.42723   | 0.011835 | s__Gordonibacter_urolithinfaciens       |
| 2.233273  | A     | 3.039457  | 0.001209 | s__Intestinibacillus_sp_Marseille_P4005 |
| 2.312272  | A     | 3.467289  | 0.01082  | s__Lachnoclostridium_sp_SNUG30386       |
| 3.973137  | A     | 3.43352   | 0.042802 | s__Parabacteroides_merdae               |
| 2.759748  | A     | 3.478293  | 0.002818 | s__Porphyromonas_asaccharolytica        |
| 3.842792  | A     | 3.515797  | 0.020253 | s__Roseburia_hominis                    |
| 2.50661   | A     | 3.001223  | 0.003657 | s__Roseburia_sp_OM02_15                 |
| 2.526415  | A     | 3.136858  | 0.048768 | s__Rothia_mucilaginosa                  |
| 3.139854  | A     | 3.128137  | 0.017517 | s__Ruminococcus_sp_AM28_41              |
| 3.668754  | A     | 3.207289  | 0.005192 | s__Ruminococcus_sp_AM42_11              |
| 4.142164  | A     | 3.904753  | 0.023528 | s__Ruminococcus_sp_TF11_2AC             |
| 2.483736  | A     | 3.360882  | 0.003976 | s__Streptococcus_oralis                 |
| 2.644429  | A     | 3.2091    | 0.011835 | s__Streptococcus_thermophilus           |
| 4.585244  | A     | 4.278783  | 0.017097 | s__Subdoligranulum_sp_APC924_74         |
| 3.618943  | A     | 3.261579  | 0.002655 | s__Subdoligranulum_sp_OF01_18           |
| 4.720056  | C     | 4.462661  | 0.004115 | s__Akkermansia_muciniphila              |
| 4.449554  | C     | 4.128709  | 0.000622 | s__Bifidobacterium_breve                |
| 4.608035  | C     | 4.220976  | 0.000623 | s__Bifidobacterium_dentium              |
| 2.993554  | C     | 3.022561  | 0.000483 | s__Chitinophaga_sp_K20C18050901         |
| 2.10224   | C     | 3.457113  | 0.034187 | s__Clostridium_neonatale                |
| 3.056729  | C     | 3.237777  | 0.003624 | s__Collinsella_sp_AM20_15AC             |
| 2.699692  | C     | 3.171003  | 0.026521 | s__Coprobacillus_sp_AF09_1A             |

---

|          |   |          |          |                                    |
|----------|---|----------|----------|------------------------------------|
| 3.587505 | C | 3.240345 | 0.006415 | s__Erysipelatoclostridium_ramosum  |
| 5.324841 | C | 4.828871 | 0.005643 | s__Escherichia_coli                |
| 2.650063 | C | 3.093711 | 0.017694 | s__Faecalibacterium_sp_AF10_46     |
| 3.120956 | C | 3.030823 | 0.011624 | s__Faecalibacterium_sp_AM43_5AT    |
| 3.343735 | C | 3.092423 | 0.008541 | s__Faecalibacterium_sp_OF03_6AC    |
| 4.49666  | C | 4.19139  | 0.028151 | s__Hungatella_hathewayi            |
| 2.204772 | C | 3.112719 | 0.034187 | s__Lactobacillus_johnsonii         |
| 2.293041 | C | 3.539852 | 0.013438 | s__Lactobacillus_pantheris         |
| 3.31278  | C | 3.002459 | 0.014882 | s__Megasphaera_micronuciformis     |
| 3.297391 | C | 3.108299 | 0.004623 | s__Merdimonas_faecis               |
| 2.97539  | C | 3.020376 | 0.015963 | s__Pediococcus_acidilactici        |
| 4.499115 | C | 4.132586 | 0.002642 | s__Raoultella_ornithinolytica      |
| 3.643284 | C | 3.400533 | 0.018162 | s__Ruminococcus_sp_AM58_7XD        |
| 3.186592 | C | 3.006158 | 0.000231 | s__Streptococcus_thermophilus      |
| 4.377102 | D | 4.118407 | 0.018355 | s__Akkermansia_muciniphila         |
| 3.195676 | D | 3.467738 | 0.031326 | s__Bacteroides_neonati             |
| 2.792276 | D | 3.010499 | 0.010517 | s__Butyricicoccus_pulliaecorum     |
| 3.476324 | D | 3.412802 | 0.048136 | s__Dysgonomonas_capnocytophagoides |
| 3.449465 | D | 3.153677 | 0.023797 | s__Eubacterium_ramulus             |
| 3.395212 | D | 3.281265 | 0.013127 | s__Fusobacterium_ulcerans          |
| 3.50117  | D | 3.311529 | 0.04674  | s__Lactobacillus_amylovorus        |
| 3.873314 | D | 3.366469 | 0.008503 | s__Phascolarctobacterium_faecium   |
| 3.375136 | D | 3.12764  | 0.047075 | s__Streptococcus_pasteurianus      |
| 3.333216 | D | 3.133706 | 9.99E-05 | s__Streptococcus_thermophilus      |
| 3.710953 | D | 3.346291 | 0.009588 | s__Subdoligranulum_sp_OF01_18      |
| 2.257619 | D | 3.130501 | 0.026292 | s__Weissella_confusa               |
| 3.741143 | H | 3.40028  | 0.004526 | s__[Eubacterium_]eligens           |
| 4.108015 | H | 3.671282 | 0.002868 | s__Bacteroides_ovatus              |
| 4.708685 | H | 4.337105 | 0.002099 | s__Bacteroides_uniformis           |
| 4.983008 | H | 4.553459 | 0.012679 | s__Bacteroides_vulgatus            |
| 3.238758 | H | 3.034634 | 0.030237 | s__Butyricicoccus_sp_OM04_18BH     |
| 3.550357 | H | 3.431429 | 0.001051 | s__Clostridium_sp_AF27_2AA         |
| 2.481864 | H | 3.099497 | 0.00311  | s__Clostridium_sp_AF34_10BH        |
| 2.426802 | H | 3.160013 | 0.00241  | s__Clostridium_sp_AF36_18BH        |
| 2.652995 | H | 3.390992 | 0.015004 | s__Clostridium_sp_AF50_3           |
| 3.728171 | H | 3.381717 | 0.000307 | s__Clostridium_sp_AM22_11AC        |
| 3.958005 | H | 3.596524 | 0.003674 | s__Clostridium_sp_AM32_2           |
| 2.63049  | H | 3.417187 | 0.00086  | s__Clostridium_sp_OF09_10          |
| 3.545307 | H | 3.192364 | 0.011674 | s__Clostridium_sp_OM04_12AA        |
| 3.766387 | H | 3.415358 | 0.000742 | s__Clostridium_sp_TM06_18          |
| 3.279899 | H | 3.08396  | 0.000169 | s__Desulfotomaculum_sp_OF05_3      |
| 3.355616 | H | 3.161151 | 0.019377 | s__Odoribacter_splanchnicus        |
| 4.425793 | H | 4.082641 | 0.012107 | s__Prevotella_sp_TF12_30           |
| 3.379662 | H | 3.252113 | 0.021547 | s__Sutterella_wadsworthensis       |

---



**Table S2 Fast-growing species in groups**

| <b>Group</b> | <b>Species</b>                   | <b>Average of growth rate</b> | <b>p value</b> |
|--------------|----------------------------------|-------------------------------|----------------|
| A            | s__Bifidobacterium_longum        | 1.4455                        | 0.000          |
| A            | s__Blautia_obeum                 | 1.4450                        | 0.004          |
| A            | s__Faecalibacterium_prausnitzii  | 1.1777                        | 0.018          |
| A            | s__Faecalibacterium_sp_AF10_46   | 1.4485                        | 0.000          |
| A            | s__Roseburia_hominis             | 1.0292                        | 0.041          |
| A            | s__Streptococcus_thermophilus    | 1.2208                        | 0.008          |
| C            | s__Akkermansia_muciniphila       | 1.1580                        | 0.027          |
| C            | s__Erysipelatoclostridium_amosum | 1.1333                        | 0.000          |
| C            | s__Escherichia_coli              | 1.4142                        | 0.000          |
| C            | s__Faecalibacterium_sp_AF10_46   | 1.1152                        | 0.010          |
| C            | s__Raoultella_ornithinolytica    | 2.6273                        | 0.000          |
| C            | s__Citrobacter_freundii          | 2.2305                        | 0.001          |
| C            | s__Streptococcus_thermophilus    | 1.2217                        | 0.000          |
| D            | s__Akkermansia_muciniphila       | 1.1350                        | 0.001          |
| D            | s__Phascolarctobacterium_faecium | 1.4378                        | 0.000          |
| D            | s__Streptococcus_thermophilus    | 1.2131                        | 0.000          |
| H            | s__Bacteroides_ovatus            | 1.1483                        | 0.007          |
| H            | s__Bacteroides_vulgatus          | 1.09                          | 0.005          |
| H            | s__Clostridium_sp_AM32_2         | 1.4862                        | 0.001          |

**Table S3 Enriched bacterial orthologous groups based on eggNOG annotations using LefSe analysis**

| Taxa                                                                                                                   | Abundance | Group | LDA_score | p value |
|------------------------------------------------------------------------------------------------------------------------|-----------|-------|-----------|---------|
| L1__Cellular_Processes_and_Signaling                                                                                   | 4.5443    | A     | 3.6384    | 0.0171  |
| L1__Cellular_Processes_and_Signaling L2__V_Defense_mechanisms                                                          | 3.9303    | A     | 3.1593    | 0.0038  |
| L1__Information_Storage_and_Processing L2__K_Transcription                                                             | 3.9899    | A     | 3.1130    | 0.0096  |
| L1__Cellular_Processes_and_Signaling L2__U_Intracellular_trafficking_secretion_and_vesicular_transport                 | 3.7290    | A     | 3.0567    | 0.0257  |
| L1__Information_Storage_and_Processing L2__L_Replication_recombination_and_repair L3__ENOG4105C61                      | 3.5277    | A     | 2.9948    | 0.0171  |
| L1__Others L2__S_Function_unknown L3__ENOG4105WR4                                                                      | 3.2230    | A     | 2.8807    | 0.0378  |
| L1__Cellular_Processes_and_Signaling L2__V_Defense_mechanisms L3__ENOG4105BZ1                                          | 3.4147    | A     | 2.8088    | 0.0009  |
| L1__Others L2__S_Function_unknown L3__ENOG4105K5W                                                                      | 3.3484    | A     | 2.7943    | 0.0293  |
| L1__Information_Storage_and_Processing L2__K_Transcription L3__ENOG41067QW                                             | 3.3357    | A     | 2.7931    | 0.0027  |
| L1__Cellular_Processes_and_Signaling L2__U_Intracellular_trafficking_secretion_and_vesicular_transport L3__ENOG4105E80 | 3.2754    | A     | 2.7104    | 0.0333  |
| L1__Cellular_Processes_and_Signaling L2__V_Defense_mechanisms L3__ENOG4105CQU                                          | 3.0637    | A     | 2.6750    | 0.0019  |
| L1__Metabolism L2__P_Inorganic_ion_transport_and_metabolism L3__ENOG4108JJB                                            | 2.9033    | A     | 2.6735    | 0.0006  |
| L1__Information_Storage_and_Processing L2__J_Translation_ribosomal_structure_and_biogenesis L3__ENOG41082SA            | 2.9105    | A     | 2.6193    | 0.0004  |
| L1__Others L2__S_Function_unknown L3__ENOG4105VPX                                                                      | 2.9197    | A     | 2.5852    | 0.0019  |
| L1__Cellular_Processes_and_Signaling L2__V_Defense_mechanisms L3__ENOG4105CJ1                                          | 2.9627    | A     | 2.5747    | 0.0016  |
| L1__Information_Storage_and_Processing L2__L_Replication_recombination_and_repair L3__ENOG4105F8B                      | 2.9399    | A     | 2.5636    | 0.0038  |
| L1__Cellular_Processes_and_Signaling L2__U_Intracellular_trafficking_secretion_and_vesicular_transport L3__ENOG4105MU5 | 3.1371    | A     | 2.5488    | 0.0257  |
| L1__Cellular_Processes_and_Signaling L2__V_Defense_mechanisms L3__ENOG4107QJQ                                          | 3.1378    | A     | 2.5357    | 0.0378  |
| L1__Cellular_Processes_and_Signaling L2__T_Signal_transduction_mechanisms L3__ENOG4105CK6                              | 3.1609    | A     | 2.5318    | 0.0011  |
| L1__Information_Storage_and_Processing L2__J_Translation_ribosomal_structure_and_biogenesis L3__ENOG4105KAR            | 2.9765    | A     | 2.5070    | 0.0196  |
| L1__Information_Storage_and_Processing L2__J_Translation_ribosomal_structure_and_biogenesis L3__ENOG4108UNN            | 2.8183    | A     | 2.4957    | 0.0032  |
| L1__Metabolism L2__P_Inorganic_ion_transport_and_metabolism L3__ENOG4105VRP                                            | 2.8903    | A     | 2.4835    | 0.0096  |
| L1__Cellular_Processes_and_Signaling L2__U_Intracellular_trafficking_secretion_and_vesicular_transport L3__ENOG4105DTV | 2.9685    | A     | 2.4691    | 0.0225  |
| L1__Metabolism L2__C_Energy_production_and_conversion L3__ENOG4105KNM                                                  | 2.8514    | A     | 2.4658    | 0.0149  |
| L1__Metabolism L2__P_Inorganic_ion_transport_and_metabolism L3__ENOG4105C59                                            | 3.0385    | A     | 2.4636    | 0.0019  |
| L1__Information_Storage_and_Processing L2__K_Transcription L3__ENOG4108ZF1                                             | 2.8914    | A     | 2.4601    | 0.0002  |
| L1__Information_Storage_and_Processing L2__L_Replication_recombination_and_repair L3__ENOG4108RZS                      | 2.9493    | A     | 2.4585    | 0.0171  |
| L1__Cellular_Processes_and_Signaling L2__T_Signal_transduction_mechanisms L3__ENOG4108YZM                              | 2.9220    | A     | 2.4569    | 0.0378  |
| L1__Others L2__S_Function_unknown L3__ENOG4105ZN2                                                                      | 2.8389    | A     | 2.4522    | 0.0378  |

|                                                                                                                    |        |   |        |        |
|--------------------------------------------------------------------------------------------------------------------|--------|---|--------|--------|
| L1_Information_Storage_and_Processing L2_J_Translation_ribosomal_structure_and_biogenesis L3_ENOG4105BZT           | 2.8228 | A | 2.4508 | 0.0014 |
| L1_Others L2_S_Function_unknown L3_ENOG4105KGF                                                                     | 2.8492 | A | 2.4478 | 0.0083 |
| L1_Information_Storage_and_Processing L2_K_Transcription L3_ENOG4105KST                                            | 2.8825 | A | 2.4475 | 0.0061 |
| L1_Information_Storage_and_Processing L2_L_Replication_recombination_and_repair L3_ENOG4105C77                     | 2.9904 | A | 2.4411 | 0.0225 |
| L1_Others L2_S_Function_unknown L3_ENOG4105VB6                                                                     | 2.8572 | A | 2.4309 | 0.0225 |
| L1_Others L2_S_Function_unknown L3_ENOG4105KRY                                                                     | 2.8639 | A | 2.4238 | 0.0171 |
| L1_Metabolism L2_P_Inorganic_ion_transport_and_metabolism L3_ENOG4105CE1                                           | 2.8077 | A | 2.4180 | 0.0378 |
| L1_Information_Storage_and_Processing L2_K_Transcription L3_ENOG4108VZQ                                            | 2.9496 | A | 2.4173 | 0.0483 |
| L1_Cellular_Processes_and_Signaling L2_M_Cell_wall_membrane_envelope_biogenesis L3_ENOG4105K64                     | 2.9338 | A | 2.4170 | 0.0083 |
| L1_Cellular_Processes_and_Signaling L2_O_Posttranslational_modification_protein_turnover_chaperones L3_ENOG4105C2Z | 2.8774 | A | 2.4144 | 0.0171 |
| L1_Information_Storage_and_Processing L2_K_Transcription L3_ENOG4105VZN                                            | 2.8325 | A | 2.4072 | 0.0333 |
| L1_Others L2_S_Function_unknown L3_ENOG4105WSQ                                                                     | 2.8340 | A | 2.4068 | 0.0293 |
| L1_Others L2_S_Function_unknown L3_ENOG4108Z5G                                                                     | 2.8909 | A | 2.4000 | 0.0149 |
| L1_Others L2_S_Function_unknown L3_ENOG4105CYH                                                                     | 2.9299 | A | 2.3961 | 0.0378 |
| L1_Information_Storage_and_Processing L2_J_Translation_ribosomal_structure_and_biogenesis L3_ENOG4105K5M           | 3.0452 | A | 2.3904 | 0.0196 |
| L1_Information_Storage_and_Processing L2_J_Translation_ribosomal_structure_and_biogenesis L3_ENOG4108UJY           | 2.7974 | A | 2.3793 | 0.0378 |
| L1_Information_Storage_and_Processing L2_J_Translation_ribosomal_structure_and_biogenesis L3_ENOG4108YZX           | 2.8612 | A | 2.3590 | 0.0428 |
| L1_Cellular_Processes_and_Signaling L2_V_Defense_mechanisms L3_ENOG4105C3S                                         | 3.0677 | A | 2.3554 | 0.0428 |
| L1_Information_Storage_and_Processing L2_J_Translation_ribosomal_structure_and_biogenesis L3_ENOG4108Z04           | 2.8914 | A | 2.3432 | 0.0483 |
| L1_Information_Storage_and_Processing L2_J_Translation_ribosomal_structure_and_biogenesis L3_ENOG4105VCC           | 2.8062 | A | 2.3377 | 0.0378 |
| L1_Cellular_Processes_and_Signaling L2_M_Cell_wall_membrane_envelope_biogenesis L3_ENOG4105DZ1                     | 2.8270 | A | 2.3173 | 0.0096 |
| L1_Information_Storage_and_Processing L2_J_Translation_ribosomal_structure_and_biogenesis L3_ENOG4108ZDX           | 2.8174 | A | 2.2899 | 0.0483 |
| L1_Cellular_Processes_and_Signaling L2_O_Posttranslational_modification_protein_turnover_chaperones L3_ENOG4105C3M | 2.7720 | A | 2.2794 | 0.0023 |
| L1_Metabolism L2_E_Amino_acid_transport_and_metabolism L3_ENOG4105CDA                                              | 2.9783 | A | 2.2067 | 0.0333 |
| L1_Metabolism                                                                                                      | 4.5918 | C | 3.1974 | 0.0131 |
| L1_Metabolism L2_E_Amino_acid_transport_and_metabolism                                                             | 4.0527 | C | 3.0209 | 0.0012 |
| L1_Others L2_S_Function_unknown L3_ENOG410619I                                                                     | 3.6718 | C | 2.8935 | 0.0259 |
| L1_Others L2_S_Function_unknown L3_ENOG4106D3Q                                                                     | 3.0080 | C | 2.6593 | 0.0083 |
| L1_Information_Storage_and_Processing L2_L_Replication_recombination_and_repair L3_ENOG4108BUD                     | 2.9416 | C | 2.5604 | 0.0131 |
| L1_Cellular_Processes_and_Signaling L2_V_Defense_mechanisms L3_ENOG4105BZ1                                         | 3.3084 | C | 2.5265 | 0.0282 |
| L1_Cellular_Processes_and_Signaling L2_M_Cell_wall_membrane_envelope_biogenesis L3_ENOG4107Y68                     | 2.9668 | C | 2.5165 | 0.0038 |

|                                                                                                                       |        |   |        |        |
|-----------------------------------------------------------------------------------------------------------------------|--------|---|--------|--------|
| L1__Information_Storage_and_Processing L2__L_Replication_recombination_and_repair L3__ENOG4105F2I                     | 2.9477 | C | 2.5063 | 0.0386 |
| L1__Information_Storage_and_Processing L2__K_Transcription L3__ENOG4105ETE                                            | 3.1323 | C | 2.4361 | 0.0131 |
| L1__Metabolism L2__E_Amino_acid_transport_and_metabolism L3__ENOG4105CDA                                              | 3.0644 | C | 2.4223 | 0.0025 |
| L1__Cellular_Processes_and_Signaling L2__M_Cell_wall_membrane_envelope_biogenesis L3__ENOG4105CNA                     | 2.8544 | C | 2.4129 | 0.0239 |
| L1__Metabolism L2__G_Carbohydrate_transport_and_metabolism L3__ENOG4105C5Y                                            | 2.9829 | C | 2.4059 | 0.0046 |
| L1__Cellular_Processes_and_Signaling L2__V_Defense_mechanisms L3__ENOG4105CJ1                                         | 2.9573 | C | 2.3946 | 0.0025 |
| L1__Metabolism L2__E_Amino_acid_transport_and_metabolism L3__ENOG4105KNY                                              | 2.8818 | C | 2.3907 | 0.0025 |
| L1__Metabolism L2__P_Inorganic_ion_transport_and_metabolism L3__ENOG4105C2T                                           | 3.0558 | C | 2.3892 | 0.0109 |
| L1__Metabolism L2__P_Inorganic_ion_transport_and_metabolism L3__ENOG4105CJM                                           | 3.0150 | C | 2.3750 | 0.0031 |
| L1__Information_Storage_and_Processing L2__L_Replication_recombination_and_repair L3__ENOG4108UUM                     | 3.0090 | C | 2.3597 | 0.0109 |
| L1__Cellular_Processes_and_Signaling L2__O_Posttranslational_modification_protein_turnover_chaperones L3__ENOG4105WAZ | 2.7977 | C | 2.3511 | 0.0156 |
| L1__Metabolism L2__P_Inorganic_ion_transport_and_metabolism L3__ENOG4105C2J                                           | 3.0208 | C | 2.3450 | 0.0386 |
| L1__Metabolism L2__G_Carbohydrate_transport_and_metabolism L3__ENOG4105CNN                                            | 2.8888 | C | 2.3087 | 0.0091 |
| L1__Metabolism L2__E_Amino_acid_transport_and_metabolism L3__ENOG4105E5Q                                              | 2.7384 | C | 2.2849 | 0.0100 |
| L1__Metabolism L2__E_Amino_acid_transport_and_metabolism L3__ENOG4105C3U                                              | 2.9204 | C | 2.2768 | 0.0046 |
| L1__Metabolism L2__P_Inorganic_ion_transport_and_metabolism L3__ENOG4108JJB                                           | 2.8332 | C | 2.2748 | 0.0091 |
| L1__Information_Storage_and_Processing L2__K_Transcription L3__ENOG4105E98                                            | 2.7893 | C | 2.2746 | 0.0005 |
| L1__Metabolism L2__C_Energy_production_and_conversion L3__ENOG4107QIW                                                 | 2.8201 | C | 2.2712 | 0.0131 |
| L1__Metabolism L2__F_Nucleotide_transport_and_metabolism L3__ENOG4105C2W                                              | 2.9068 | C | 2.2685 | 0.0042 |
| L1__Metabolism L2__C_Energy_production_and_conversion L3__ENOG4105C6N                                                 | 2.7879 | C | 2.2591 | 0.0010 |
| L1__Metabolism L2__G_Carbohydrate_transport_and_metabolism L3__ENOG4105CS2                                            | 2.7552 | C | 2.2517 | 0.0028 |
| L1__Metabolism L2__E_Amino_acid_transport_and_metabolism L3__ENOG4105C53                                              | 2.8680 | C | 2.2436 | 0.0202 |
| L1__Metabolism L2__G_Carbohydrate_transport_and_metabolism L3__ENOG4108IJ9                                            | 2.7987 | C | 2.2420 | 0.0034 |
| L1__Information_Storage_and_Processing L2__L_Replication_recombination_and_repair L3__ENOG4105C24                     | 2.7145 | C | 2.2087 | 0.0000 |
| L1__Information_Storage_and_Processing L2__L_Replication_recombination_and_repair L3__ENOG41067QG                     | 2.8165 | C | 2.2031 | 0.0305 |
| L1__Metabolism L2__G_Carbohydrate_transport_and_metabolism L3__ENOG4105CMG                                            | 2.7243 | C | 2.2030 | 0.0259 |
| L1__Metabolism L2__G_Carbohydrate_transport_and_metabolism L3__ENOG4105CSH                                            | 2.7595 | C | 2.2023 | 0.0220 |
| L1__Metabolism L2__E_Amino_acid_transport_and_metabolism L3__ENOG4108JQ7                                              | 2.7852 | C | 2.1970 | 0.0013 |
| L1__Information_Storage_and_Processing L2__K_Transcription L3__ENOG4108ZF1                                            | 2.7292 | C | 2.1960 | 0.0259 |
| L1__Others L2__S_Function_unknown L3__ENOG4105KEM                                                                     | 2.7645 | C | 2.1946 | 0.0046 |
| L1__Metabolism L2__C_Energy_production_and_conversion L3__ENOG4105CCY                                                 | 2.7271 | C | 2.1932 | 0.0038 |

|                                                                                                                       |        |   |        |        |
|-----------------------------------------------------------------------------------------------------------------------|--------|---|--------|--------|
| L1__Cellular_Processes_and_Signaling L2__O_Posttranslational_modification_protein_turnover_chaperones L3__ENOG4105C3H | 2.7005 | C | 2.1897 | 0.0131 |
| L1__Metabolism L2__P_Inorganic_ion_transport_and_metabolism L3__ENOG4105C52                                           | 2.7951 | C | 2.1656 | 0.0100 |
| L1__Metabolism L2__G_Carbohydrate_transport_and_metabolism L3__ENOG4105CJQ                                            | 2.6905 | C | 2.1651 | 0.0486 |
| L1__Information_Storage_and_Processing L2__J_Translation_ribosomal_structure_and_biogenesis L3__ENOG4105VCC           | 2.7428 | C | 2.1467 | 0.0062 |
| L1__Cellular_Processes_and_Signaling L2__M_Cell_wall_membrane_envelope_biogenesis L3__ENOG4105CJN                     | 2.7084 | C | 2.1466 | 0.0016 |
| L1__Cellular_Processes_and_Signaling L2__O_Posttranslational_modification_protein_turnover_chaperones L3__ENOG4105C2Z | 2.8364 | C | 2.1453 | 0.0450 |
| L1__Cellular_Processes_and_Signaling L2__O_Posttranslational_modification_protein_turnover_chaperones L3__ENOG4105C0H | 2.7090 | C | 2.1352 | 0.0386 |
| L1__Metabolism L2__E_Amino_acid_transport_and_metabolism L3__ENOG4105C7K                                              | 2.7116 | C | 2.1165 | 0.0062 |
| L1__Metabolism L2__E_Amino_acid_transport_and_metabolism L3__ENOG4105CPQ                                              | 2.7642 | C | 2.1033 | 0.0051 |
| L1__Cellular_Processes_and_Signaling L2__M_Cell_wall_membrane_envelope_biogenesis L3__ENOG4105DZ1                     | 2.7871 | C | 2.0859 | 0.0259 |
| L1__Information_Storage_and_Processing L2__L_Replication_recombination_and_repair L3__ENOG4105F3K                     | 2.6997 | C | 2.0321 | 0.0386 |
| L1__Others L2__S_Function_unknown L3__ENOG4105YNI                                                                     | 3.8235 | D | 3.1945 | 0.0097 |
| L1__Cellular_Processes_and_Signaling L2__V_Defense_mechanisms                                                         | 3.8694 | D | 2.9109 | 0.0261 |
| L1__Information_Storage_and_Processing L2__K_Transcription L3__ENOG41067QW                                            | 3.2438 | D | 2.6220 | 0.0018 |
| L1__Others L2__S_Function_unknown L3__ENOG410766Y                                                                     | 3.1225 | D | 2.5779 | 0.0173 |
| L1__Cellular_Processes_and_Signaling L2__V_Defense_mechanisms L3__ENOG4105BZ1                                         | 3.3204 | D | 2.5773 | 0.0199 |
| L1__Metabolism L2__P_Inorganic_ion_transport_and_metabolism L3__ENOG4108JJB                                           | 2.8667 | D | 2.3924 | 0.0008 |
| L1__Cellular_Processes_and_Signaling L2__T_Signal_transduction_mechanisms L3__ENOG4105CK6                             | 3.1338 | D | 2.3923 | 0.0015 |
| L1__Information_Storage_and_Processing L2__K_Transcription L3__ENOG4108ZF1                                            | 2.7949 | D | 2.3462 | 0.0030 |
| L1__Cellular_Processes_and_Signaling L2__V_Defense_mechanisms L3__ENOG4105CQU                                         | 2.9664 | D | 2.3359 | 0.0057 |
| L1__Cellular_Processes_and_Signaling L2__M_Cell_wall_membrane_envelope_biogenesis L3__ENOG4105DZ1                     | 2.7956 | D | 2.3181 | 0.0162 |
| L1__Information_Storage_and_Processing L2__K_Transcription L3__ENOG4105KST                                            | 2.8113 | D | 2.3065 | 0.0078 |
| L1__Metabolism L2__C_Energy_production_and_conversion L3__ENOG4105KNM                                                 | 2.7412 | D | 2.3010 | 0.0131 |
| L1__Others L2__S_Function_unknown L3__ENOG4108Z5G                                                                     | 2.8252 | D | 2.2859 | 0.0384 |
| L1__Others L2__S_Function_unknown L3__ENOG4105VPX                                                                     | 2.7361 | D | 2.2836 | 0.0186 |
| L1__Information_Storage_and_Processing L2__J_Translation_ribosomal_structure_and_biogenesis L3__ENOG4108ZDX           | 2.7741 | D | 2.2670 | 0.0261 |
| L1__Cellular_Processes_and_Signaling L2__O_Posttranslational_modification_protein_turnover_chaperones L3__ENOG4105C3M | 2.7693 | D | 2.2669 | 0.0151 |
| L1__Information_Storage_and_Processing L2__K_Transcription L3__ENOG4105VZN                                            | 2.7499 | D | 2.2620 | 0.0360 |
| L1__Cellular_Processes_and_Signaling L2__V_Defense_mechanisms L3__ENOG4105CJ1                                         | 2.8795 | D | 2.2609 | 0.0084 |
| L1__Others L2__S_Function_unknown L3__ENOG4105VDK                                                                     | 2.8001 | D | 2.2523 | 0.0131 |
| L1__Others L2__S_Function_unknown L3__ENOG4105VB6                                                                     | 2.7510 | D | 2.2513 | 0.0162 |

|                                                                                                                       |        |   |        |        |
|-----------------------------------------------------------------------------------------------------------------------|--------|---|--------|--------|
| L1__Information_Storage_and_Processing L2__J_Translation_ribosomal_structure_and_biogenesis L3__ENOG4108UIK           | 2.7156 | D | 2.2493 | 0.0162 |
| L1__Metabolism L2__E_Amino_acid_transport_and_metabolism L3__ENOG4108JQ7                                              | 2.7251 | D | 2.2435 | 0.0105 |
| L1__Information_Storage_and_Processing L2__L_Replication_recombination_and_repair L3__ENOG4108UUM                     | 2.9688 | D | 2.2329 | 0.0279 |
| L1__Metabolism L2__G_Carbohydrate_transport_and_metabolism L3__ENOG4105C5Y                                            | 2.8845 | D | 2.2326 | 0.0261 |
| L1__Metabolism L2__P_Inorganic_ion_transport_and_metabolism L3__ENOG4105C59                                           | 2.9879 | D | 2.2309 | 0.0121 |
| L1__Metabolism L2__F_Nucleotide_transport_and_metabolism L3__ENOG4108V82                                              | 2.6959 | D | 2.1856 | 0.0261 |
| L1__Cellular_Processes_and_Signaling L2__O_Posttranslational_modification_protein_turnover_chaperones L3__ENOG4105C2Z | 2.8549 | D | 2.1794 | 0.0491 |
| L1__Metabolism L2__E_Amino_acid_transport_and_metabolism L3__ENOG4105BZG                                              | 2.8357 | D | 2.1728 | 0.0279 |
| L1__Others L2__S_Function_unknown L3__ENOG4108Z66                                                                     | 2.7289 | D | 2.0109 | 0.0338 |

**Table S4 Enriched bacterial metabolic pathway based on KO annotations using LEfSe analysis**

| <b>Taxa</b>                                                                                      | <b>Abundance</b> | <b>Group</b> | <b>LDA_score</b> | <b>Pvalue</b> |
|--------------------------------------------------------------------------------------------------|------------------|--------------|------------------|---------------|
| L1__Genetic_Information_Processing                                                               | 5.2904           | A            | 3.9794           | 0.0129        |
| L1__Genetic_Information_Processing L2__Translation                                               | 4.7750           | A            | 3.6378           | 0.0378        |
| L1__Metabolism L2__Amino_acid_metabolism                                                         | 5.1207           | A            | 3.4410           | 0.0149        |
| L1__Metabolism L2__Metabolism_of_other_amino_acids L3__D_Alanine_metabolism                      | 4.2979           | A            | 3.2479           | 0.0005        |
| L1__Genetic_Information_Processing L2__Translation L3__Aminoacyl_tRNA_biosynthesis               | 4.2763           | A            | 3.2407           | 0.0044        |
| L1__Human_Diseases L2__Drug_resistance_antimicrobial L3__Vancomycin_resistance                   | 4.1894           | A            | 3.2356           | 0.0005        |
| L1__Metabolism L2__Glycan_biosynthesis_and_metabolism L3__Peptidoglycan_biosynthesis             | 4.2572           | A            | 3.1526           | 0.0129        |
| L1__Genetic_Information_Processing L2__Replication_and_repair L3__Nucleotide_excision_repair     | 4.0070           | A            | 3.1250           | 0.0027        |
| L1__Genetic_Information_Processing L2__Replication_and_repair L3__Base_excision_repair           | 4.1019           | A            | 3.1128           | 0.0027        |
| L1__Metabolism L2__Carbohydrate_metabolism L3__Starch_and_sucrose_metabolism                     | 4.1772           | A            | 3.0800           | 0.0171        |
| L1__Metabolism L2__Metabolism_of_cofactors_and_vitamins L3__Porphyrin_and_chlorophyll_metabolism | 3.8740           | A            | 2.9683           | 0.0257        |
| L1__Cellular_Processes L2__Cellular_community_prokaryotes L3__Quorum_sensing                     | 3.8624           | A            | 2.8690           | 0.0052        |
| L1__Metabolism L2__Amino_acid_metabolism L3__Lysine_biosynthesis                                 | 4.1361           | A            | 2.8392           | 0.0378        |
| L1__Metabolism L2__Amino_acid_metabolism L3__Cysteine_and_methionine_metabolism                  | 4.0656           | A            | 2.8008           | 0.0149        |
| L1__Metabolism L2__Lipid_metabolism L3__Secondary_bile_acid_biosynthesis                         | 3.7478           | A            | 2.7974           | 0.0257        |
| L1__Metabolism L2__Metabolism_of_other_amino_acids L3__Selenocompound_metabolism                 | 4.0621           | A            | 2.7618           | 0.0483        |
| L1__Genetic_Information_Processing L2__Transcription L3__RNA_polymerase                          | 3.6669           | A            | 2.7513           | 0.0023        |
| L1__Genetic_Information_Processing L2__Transcription                                             | 3.6673           | A            | 2.7509           | 0.0023        |
| L1__Metabolism L2__Amino_acid_metabolism L3__Arginine_biosynthesis                               | 4.0289           | A            | 2.7069           | 0.0257        |
| L1__Organismal_Systems L2__Sensory_system L3__Olfactory_transduction                             | 0.4017           | A            | 2.6743           | 0.0338        |
| L1__Organismal_Systems L2__Sensory_system                                                        | 0.4017           | A            | 2.6591           | 0.0338        |
| L1__Organismal_Systems L2__Immune_system L3__Complement_and_coagulation_cascades                 | 0.4927           | A            | 2.3543           | 0.0036        |
| L1__Human_Diseases L2__Infectious_disease_bacterial L3__Tuberculosis                             | 3.0706           | A            | 2.3462           | 0.0181        |
| L1__Cellular_Processes L2__Transport_and_catabolism L3__Endocytosis                              | 0.6719           | A            | 2.1896           | 0.0196        |
| L1__Cellular_Processes L2__Transport_and_catabolism L3__Autophagy_yeast                          | 2.3875           | A            | 2.0514           | 0.0014        |
| L1__Cellular_Processes L2__Cell_motility                                                         | 4.3308           | C            | 3.6952           | 0.0170        |
| L1__Environmental_Information_Processing L2__Membrane_transport                                  | 4.5607           | C            | 3.6054           | 0.0450        |
| L1__Metabolism L2__Metabolism_of_other_amino_acids                                               | 4.8139           | C            | 3.5455           | 0.0007        |
| L1__Cellular_Processes L2__Cell_motility L3__Flagellar_assembly                                  | 4.0076           | C            | 3.4775           | 0.0143        |

|                                                                                                                  |        |   |        |        |
|------------------------------------------------------------------------------------------------------------------|--------|---|--------|--------|
| L1__Cellular_Processes L2__Cell_motility L3__Bacterial_chemotaxis                                                | 4.0508 | C | 3.2915 | 0.0486 |
| L1__Metabolism L2__Metabolism_of_other_amino_acids L3__D_Alanine_metabolism                                      | 4.2902 | C | 3.2122 | 0.0000 |
| L1__Metabolism L2__Amino_acid_metabolism L3__Valine_leucine_and_isoleucine_biosynthesis                          | 4.4607 | C | 3.2043 | 0.0083 |
| L1__Environmental_Information_Processing L2__Membrane_transport L3__ABC_transporters                             | 3.9025 | C | 3.1180 | 0.0062 |
| L1__Metabolism L2__Xenobiotics_biodegradation_and_metabolism L3__Nitrotoluene_degradation                        | 3.6368 | C | 3.0556 | 0.0012 |
| L1__Metabolism L2__Metabolism_of_other_amino_acids L3__Selenocompound_metabolism                                 | 4.0841 | C | 2.9021 | 0.0015 |
| L1__Cellular_Processes L2__Transport_and_catabolism L3__Endocytosis                                              | 0.5890 | C | 2.8704 | 0.0091 |
| L1__Cellular_Processes L2__Cellular_community_prokaryotes L3__Quorum_sensing                                     | 3.8632 | C | 2.8575 | 0.0016 |
| L1__Cellular_Processes L2__Transport_and_catabolism L3__Peroxisome                                               | 3.2556 | C | 2.8230 | 0.0031 |
| L1__Metabolism L2__Lipid_metabolism L3__Fatty_acid_degradation                                                   | 3.6265 | C | 2.7651 | 0.0220 |
| L1__Metabolism L2__Glycan_biosynthesis_and_metabolism L3__Arabinogalactan_biosynthesis_Mycobacterium             | 3.2598 | C | 2.7349 | 0.0008 |
| L1__Genetic_Information_Processing L2__Transcription L3__RNA_polymerase                                          | 3.6397 | C | 2.6337 | 0.0120 |
| L1__Genetic_Information_Processing L2__Transcription                                                             | 3.6399 | C | 2.6327 | 0.0120 |
| L1__Metabolism L2__Lipid_metabolism L3__Biosynthesis_of_unsaturated_fatty_acids                                  | 3.1251 | C | 2.5873 | 0.0202 |
| L1__Metabolism L2__Lipid_metabolism L3__Glycerolipid_metabolism                                                  | 3.6992 | C | 2.5771 | 0.0450 |
| L1__Metabolism L2__Xenobiotics_biodegradation_and_metabolism L3__Aminobenzoate_degradation                       | 3.2232 | C | 2.5745 | 0.0170 |
| L1__Metabolism L2__Amino_acid_metabolism L3__Tryptophan_metabolism                                               | 3.3618 | C | 2.5334 | 0.0259 |
| L1__Metabolism L2__Xenobiotics_biodegradation_and_metabolism L3__Caprolactam_degradation                         | 3.1353 | C | 2.4941 | 0.0417 |
| L1__Human_Diseases L2__Immune_disease                                                                            | 0.2350 | C | 2.4847 | 0.0412 |
| L1__Metabolism L2__Lipid_metabolism L3__Glycerophospholipid_metabolism                                           | 3.7515 | C | 2.4617 | 0.0386 |
| L1__Metabolism L2__Metabolism_of_terpenoids_and_polyketides L3__Geraniol_degradation                             | 2.6061 | C | 2.3430 | 0.0265 |
| L1__Metabolism L2__Xenobiotics_biodegradation_and_metabolism L3__Chlorocyclohexane_and_chlorobenzene_degradation | 2.9583 | C | 2.3376 | 0.0220 |
| L1__Human_Diseases L2__Infectious_disease_parasitic                                                              | 2.8302 | C | 2.2683 | 0.0016 |
| L1__Metabolism L2__Energy_metabolism L3__Methane_metabolism                                                      | 3.7063 | C | 2.1651 | 0.0100 |
| L1__Human_Diseases L2__Infectious_disease_parasitic L3__African_trypanosomiasis                                  | 2.4874 | C | 2.1532 | 0.0270 |
| L1__Metabolism L2__Metabolism_of_cofactors_and_vitamins L3__Retinol_metabolism                                   | 2.4042 | C | 2.1086 | 0.0318 |
| L1__Genetic_Information_Processing L2__Translation L3__Ribosome_biogenesis_in_eukaryotes                         | 2.9153 | C | 2.0690 | 0.0075 |
| L1__Human_Diseases L2__Infectious_disease_bacterial L3__Staphylococcus_aureus_infection                          | 2.3700 | C | 2.0473 | 0.0016 |
| L1__Metabolism L2__Carbohydrate_metabolism L3__C5_Branched_dibasic_acid_metabolism                               | 3.7792 | D | 3.4246 | 0.0094 |
| L1__Metabolism L2__Metabolism_of_other_amino_acids L3__D_Alanine_metabolism                                      | 4.2758 | D | 3.1424 | 0.0009 |



|                                                                                                      |        |   |        |        |
|------------------------------------------------------------------------------------------------------|--------|---|--------|--------|
| L1__Human_Diseases L2__Drug_resistance_antimicrobial L3__Vancomycin_resistance                       | 4.1358 | D | 2.9003 | 0.0297 |
| L1__Metabolism L2__Metabolism_of_cofactors_and_vitamins L3__Porphyrin_and_chlorophyll_metabolism     | 3.8549 | D | 2.8576 | 0.0244 |
| L1__Cellular_Processes L2__Transport_and_catabolism L3__Peroxisome                                   | 3.2032 | D | 2.7848 | 0.0073 |
| L1__Metabolism L2__Metabolism_of_other_amino_acids L3__Selenocompound_metabolism                     | 4.0598 | D | 2.7056 | 0.0173 |
| L1__Cellular_Processes L2__Cellular_community_prokaryotes L3__Quorum_sensing                         | 3.8277 | D | 2.6062 | 0.0435 |
| L1__Metabolism L2__Glycan_biosynthesis_and_metabolism L3__Arabinogalactan_biosynthesis_Mycobacterium | 3.1199 | D | 2.4005 | 0.0261 |
| L1__Genetic_Information_Processing L2__Transcription                                                 | 3.6192 | D | 2.3941 | 0.0228 |
| L1__Genetic_Information_Processing L2__Transcription L3__RNA_polymerase                              | 3.6181 | D | 2.3887 | 0.0228 |
| L1__Metabolism L2__Metabolism_of_other_amino_acids L3__D_Arginine_and_D_ornithine_metabolism         | 2.9080 | D | 2.3321 | 0.0090 |
| L1__Metabolism L2__Xenobiotics_biodegradation_and_metabolism L3__Aminobenzoate_degradation           | 3.1349 | D | 2.2736 | 0.0435 |
| L1__Human_Diseases L2__Immune_disease                                                                | 0.0758 | D | 2.0908 | 0.0211 |
| L1__Organismal_Systems L2__Digestive_system L3__Mineral_absorption                                   | 2.8283 | D | 2.0314 | 0.0355 |
| L1__Cellular_Processes L2__Transport_and_catabolism L3__Endocytosis                                  | 0.5879 | D | 2.0025 | 0.0261 |
| L1__Metabolism L2__Biosynthesis_of_other_secondary_metabolites L3__Streptomycin_biosynthesis         | 4.3150 | H | 3.3849 | 0.0337 |
| L1__Metabolism L2__Lipid_metabolism L3__Fatty_acid_biosynthesis                                      | 4.3225 | H | 3.3541 | 0.0079 |
| L1__Metabolism L2__Glycan_biosynthesis_and_metabolism L3__Lipopolysaccharide_biosynthesis            | 3.9296 | H | 3.2705 | 0.0165 |
| L1__Metabolism L2__Carbohydrate_metabolism L3__Citrate_cycle_TCA_cycle                               | 4.1255 | H | 3.1283 | 0.0109 |
| L1__Metabolism L2__Metabolism_of_cofactors_and_vitamins L3__Vitamin_B6_metabolism                    | 4.0404 | H | 2.9738 | 0.0163 |
| L1__Metabolism L2__Metabolism_of_cofactors_and_vitamins L3__Folate_biosynthesis                      | 3.9551 | H | 2.9312 | 0.0445 |
| L1__Metabolism L2__Metabolism_of_terpenoids_and_polyketides L3__Zeatin_biosynthesis                  | 3.7492 | H | 2.9154 | 0.0456 |
| L1__Metabolism L2__Energy_metabolism L3__Carbon_fixation_in_photosynthetic_organisms                 | 4.2837 | H | 2.8725 | 0.0149 |
| L1__Metabolism L2__Metabolism_of_terpenoids_and_polyketides L3__Polyketide_sugar_unit_biosynthesis   | 3.6045 | H | 2.8196 | 0.0456 |
| L1__Metabolism L2__Glycan_biosynthesis_and_metabolism L3__N_Glycan_biosynthesis                      | 2.7062 | H | 2.2112 | 0.0148 |
| L1__Metabolism L2__Lipid_metabolism L3__Steroid_hormone_biosynthesis                                 | 2.5557 | H | 2.1685 | 0.0119 |

**Table S5 Enriched bacterial virulence factors in groups using LEfSe analysis**

| Virulence Factor gene | description                                                              | keyword                                              | max log mean | Group | Log (LDA score) | p-value (adjusted) | total                                    |
|-----------------------|--------------------------------------------------------------------------|------------------------------------------------------|--------------|-------|-----------------|--------------------|------------------------------------------|
| spaG                  | SpaH-type pili minorsubunit SpaG, pilus tip protein                      | Adherence                                            | 2.59         | A     | 2.06            | 0.01               | Colonization, adherece and invasion (31) |
| p97                   | protein p97; cilium adhesin                                              | Adherence                                            | 2.63         | A     | 2.10            | 0.00               |                                          |
| lytC                  | 1,4-beta-N-acetylmuramidase                                              | Adherence                                            | 3.30         | A     | 2.74            | 0.01               |                                          |
| pebA                  | bifunctional adhesin/ABC transporter aspartate/glutamate-binding protein | Adherence                                            | 3.73         | A     | 2.87            | 0.04               |                                          |
| pilT                  | twitching motility protein PilT                                          | Adherence                                            | 2.97         | A     | 2.35            | 0.01               |                                          |
| htpB                  | Hsp60, 60K heat shock protein HtpB                                       | Adherence                                            | 3.33         | A     | 2.31            | 0.03               |                                          |
| cna                   | collagen adhesin precursor                                               | Adherence                                            | 2.67         | A     | 2.21            | 0.00               |                                          |
| papX                  | PapX protein regulates flagellum synthesis to repress motility           | Adherence                                            | 2.96         | A     | 2.43            | 0.04               |                                          |
| srtC                  | sortase                                                                  | Adherence; Biofilm formation; Sortase-assembled pili | 2.81         | A     | 2.39            | 0.00               |                                          |
| ebpA                  | endocarditis and biofilm-associated pilus tip protein EbpA               | Adherence; Biofilm formation; Sortase-assembled pili | 2.55         | A     | 2.05            | 0.00               |                                          |
| yhxB_manB             | phosphomannomutase                                                       | Adherence; Endotoxin                                 | 3.36         | A     | 2.48            | 0.01               |                                          |
| msbA                  | lipid transporter ATP-binding/permease                                   | Adherence; Endotoxin                                 | 4.05         | A     | 3.28            | 0.00               |                                          |
| orfM                  | deoxyribonucleotide triphosphate pyrophosphatase                         | Adherence; Endotoxin                                 | 3.51         | A     | 2.46            | 0.02               |                                          |
| fctB                  | minor pilin FctB                                                         | Adherence; Sortase-assembled pili                    | 2.57         | A     | 2.17            | 0.00               |                                          |
| srtG1                 | sortase, SrtB family                                                     | Adherence; Sortase-assembled pili                    | 2.95         | A     | 2.34            | 0.01               |                                          |
| sipA                  | signal peptidase I                                                       | Adherence; Sortase-assembled pili                    | 3.43         | A     | 2.88            | 0.00               |                                          |
| srtC_1_srtB           | sortase                                                                  | Adherence; Sortase-assembled pili                    | 2.65         | A     | 2.20            | 0.00               |                                          |

|          |                                                                        |                                                      |      |   |      |      |  |
|----------|------------------------------------------------------------------------|------------------------------------------------------|------|---|------|------|--|
| tapB     | type IV pilus assembly ATPase, PilB-like                               | Adherence; Type IV pili                              | 2.33 | A | 2.02 | 0.02 |  |
| fsrA     | response regulator                                                     | Quorum sensing system;<br>Two-component system       | 3.15 | A | 2.66 | 0.01 |  |
| bfmR     | biofilm-controlling response regulator                                 | Regulation; Two-component system                     | 4.26 | A | 3.43 | 0.01 |  |
| clpC     | endopeptidase Clp ATP-binding chain C                                  | Stress protein                                       | 3.70 | A | 2.83 | 0.00 |  |
| gtcA     | wall teichoic acid glycosylation protein GtcA                          | Invasion                                             | 3.11 | A | 2.62 | 0.01 |  |
| iap_cwhA | P60 extracellular protein, invasion associated protein Iap             | Invasion                                             | 4.23 | A | 3.86 | 0.00 |  |
| inlA     | Internalin A                                                           | Invasion                                             | 2.92 | A | 2.27 | 0.03 |  |
| flhF     | flagellar biosynthesis protein                                         | Secretion system; Invasion;<br>Motility              | 3.63 | A | 2.74 | 0.00 |  |
| fleN     | flagellar synthesis regulator FleN                                     | Secretion system; Invasion;<br>Motility              | 2.98 | A | 2.27 | 0.01 |  |
| virD4    | type IV secretion system component VirD4                               | Secretion system; Type IV secretion system; Type IVa | 4.04 | A | 3.41 | 0.04 |  |
| srtD     | fimbrial associated sortase                                            | Adherence                                            | 2.82 | A | 2.26 | 0.01 |  |
| essC     | type VII secretion system protein EssC, FtsK/SpoIIIE family ATPase     | Secretion system; Type VII secretion system          | 3.43 | A | 2.64 | 0.00 |  |
| esxA     | type VII secretion system protein secreted protein EsxA                | Secretion system; Type VII secretion system          | 2.51 | A | 2.08 | 0.00 |  |
| fssI     | Enterococcus faecalis surface protein FssI, fibrinogen binding protein | Adherence                                            | 3.26 | A | 2.67 | 0.04 |  |
| eccA1    | ESX-1 type VII secretion system AAA+ ATPase EccA1                      | Secretion system; Type VII secretion system          | 3.21 | A | 2.73 | 0.00 |  |
| yscN     | type III secretion system ATPase YscN                                  | Secretion system; Type III secretion system          | 3.14 | A | 2.58 | 0.01 |  |
| cdsD     | Type III secretion system inner membrane ring complex protein CdsD     | Secretion system; Type III secretion system          | 2.85 | A | 2.37 | 0.01 |  |
| pkn5     | serine/threonine protein kinase                                        | Secretion system; Type III secretion system          | 2.71 | A | 2.25 | 0.01 |  |
| cdsN     | Type III secretion system ATPase                                       | Secretion system; Type III                           | 3.15 | A | 2.62 | 0.00 |  |

|         |                                                                  |                                              |      |   |      |      |
|---------|------------------------------------------------------------------|----------------------------------------------|------|---|------|------|
|         |                                                                  | secretion system                             |      |   |      |      |
| spa47   | type III secretion system ATPase spa47                           | Secretion system; Type III secretion system  | 2.84 | A | 2.39 | 0.02 |
| coxH2   | Coxiella Dot/Icm type IVB secretion system translocated effector | Secretion system; Type IV secretion system   | 3.49 | A | 2.65 | 0.01 |
| lirB    | Dot/Icm type IV secretion system effector LirB                   | Secretion system; Type IV secretion system   | 3.68 | A | 2.68 | 0.03 |
| lpg2936 | Dot/Icm type IV secretion system effector                        | Secretion system; Type IV secretion system   | 3.35 | A | 2.37 | 0.02 |
| wcbQ    | capsular polysaccharide biosynthesis transmembrane protein       | Antiphagocytosis                             | 3.11 | A | 2.56 | 0.00 |
| wcbJ    | capsular polysaccharide biosynthesis protein                     | Antiphagocytosis                             | 2.71 | A | 2.20 | 0.04 |
| hasC    | UDP-glucose pyrophosphorylase                                    | Antiphagocytosis; Adherence; Tissue invasion | 3.43 | A | 2.43 | 0.03 |
| glf     | UDP-galactopyranose mutase                                       | Antiphagocytosis; Serum resistance           | 3.19 | A | 2.51 | 0.01 |
| Cj1436c | aminotransferase                                                 | Antiphagocytosis; Serum resistance           | 3.53 | A | 2.61 | 0.04 |
| capA    | CapA, required for Poly-gamma-glutamate transport                | Antiphagocytosis; Serum resistance           | 3.18 | A | 2.37 | 0.04 |
| cps4A   | capsular polysaccharide biosynthesis protein Cps4A               | Antiphagocytosis; Serum resistance           | 3.15 | A | 2.57 | 0.00 |
| cps4E   | capsular polysaccharide biosynthesis protein Cps4E               | Antiphagocytosis; Serum resistance           | 2.79 | A | 2.27 | 0.04 |
| cps4H   | capsular polysaccharide biosynthesis protein Cps4H               | Antiphagocytosis; Serum resistance           | 3.22 | A | 2.50 | 0.01 |
| ctrD    | capsule polysaccharide export ATP-binding protein CtrD           | Antiphagocytosis; Serum resistance           | 2.56 | A | 2.07 | 0.00 |
| Cj1432c | sugar transferase                                                | Antiphagocytosis; Serum resistance           | 2.63 | A | 2.18 | 0.03 |
| cap8B   | capsular polysaccharide synthesis enzyme Cap8B                   | Antiphagocytosis; Serum                      | 3.02 | A | 2.40 | 0.02 |

|       |                                                                                             |                                    |      |   |      |      |                                          |
|-------|---------------------------------------------------------------------------------------------|------------------------------------|------|---|------|------|------------------------------------------|
|       |                                                                                             | resistance                         |      |   |      |      |                                          |
| cps4C | capsular polysaccharide biosynthesis protein Cps4C                                          | Antiphagocytosis; Serum resistance | 2.69 | A | 2.09 | 0.04 |                                          |
| cpsE  | glycosyl transferase, group 2 family protein                                                | Antiphagocytosis; Serum resistance | 3.34 | A | 2.69 | 0.00 |                                          |
| cpsG  | MurB family protein                                                                         | Antiphagocytosis; Serum resistance | 3.51 | A | 2.75 | 0.00 |                                          |
| cpsA  | CpsA responsible for transfer of CPS from the membrane lipid to the cell wall peptidoglycan | Antiphagocytosis; Serum resistance | 3.49 | A | 2.56 | 0.01 |                                          |
| cpsC  | teichoic acid biosynthesis protein, putative                                                | Antiphagocytosis; Serum resistance | 2.99 | A | 2.47 | 0.02 |                                          |
| lspA  | signal peptidase II                                                                         | Peptidase                          | 3.35 | A | 2.60 | 0.00 |                                          |
| recN  | DNA repair protein RecN                                                                     | Stress protein                     | 3.29 | A | 2.26 | 0.05 |                                          |
| fbpC  | iron(III) ABC transporter, ATP-binding protein                                              | Iron uptake; ABC transporter       | 4.58 | A | 3.68 | 0.01 | Nutrition uptake, growth and spread (17) |
| hitC  | iron(III) ABC transporter, ATP-binding protein                                              | Iron uptake; ABC transporter       | 4.47 | A | 3.50 | 0.02 |                                          |
| feoB  | ferrous iron transporter B                                                                  | Iron uptake; Ferrous iron uptake   | 3.59 | A | 2.57 | 0.05 |                                          |
| feoA  | ferrous iron transporter A                                                                  | Iron uptake; Ferrous iron uptake   | 3.82 | A | 3.15 | 0.00 |                                          |
| hgpC  | hemoglobin-binding protein                                                                  | Iron uptake; Heme uptake           | 2.67 | A | 2.01 | 0.03 |                                          |
| srtB  | NPQTN specific sortase B                                                                    | Iron uptake; Heme uptake           | 3.11 | A | 2.54 | 0.02 |                                          |
| pchG  | pyochelin biosynthetic protein PchG                                                         | Iron uptake; Siderophore           | 1.17 | A | 2.02 | 0.04 |                                          |
| ybtP  | lipoprotein inner membrane ABC-transporter                                                  | Iron uptake; Siderophore           | 3.48 | A | 2.83 | 0.01 |                                          |
| bauE  | ferric siderophore ABC transporter, ATP-binding protein BauE                                | Iron uptake; Siderophore           | 3.78 | A | 2.54 | 0.05 |                                          |
| barA  | siderophore efflux system of the ABC superfamily                                            | Iron uptake; Siderophore           | 2.81 | A | 2.33 | 0.00 |                                          |
| barB  | siderophore efflux system of the ABC superfamily                                            | Iron uptake; Siderophore           | 2.47 | A | 2.02 | 0.05 |                                          |
| ideR  | Iron-dependent repressor and activator IdeR                                                 | Regulation                         | 3.60 | A | 3.06 | 0.01 |                                          |
| phoP  | Possible two component system response transcriptional positive                             | Regulation                         | 4.21 | A | 3.12 | 0.03 |                                          |

|       |                                                                           |                                                      |      |   |      |      |                          |
|-------|---------------------------------------------------------------------------|------------------------------------------------------|------|---|------|------|--------------------------|
|       | regulator PhoP                                                            |                                                      |      |   |      |      |                          |
| allB  | allantoinase                                                              | Nutritional factor                                   | 3.51 | A | 2.53 | 0.01 |                          |
| ppkA  | serine/threonine protein kinase PpkA                                      | Secretion system; Type VI secretion system           | 3.69 | A | 3.12 | 0.01 |                          |
| pppA  | Pseudomonas protein phosphatase PppA                                      | Secretion system; Type VI secretion system           | 3.42 | A | 2.88 | 0.00 |                          |
| nagK  | hyaluronidase                                                             | Exoenzyme; Carbohydrate-active enzyme; Hyaluronidase | 2.82 | A | 2.31 | 0.01 |                          |
| wzt   | lipopolysaccharide O-antigen ABC transport system ATP-binding component   | Endotoxin                                            | 3.32 | A | 2.67 | 0.01 | Toxin and endotoxin (15) |
| wzm   | lipopolysaccharide O-antigen ABC transport system transmembrane component | Endotoxin                                            | 3.09 | A | 2.51 | 0.00 |                          |
| lpxE  | phosphatidylglycerophosphatase B                                          | Endotoxin                                            | 2.95 | A | 2.32 | 0.03 |                          |
| wbbM  | glycosyltransferase                                                       | Endotoxin                                            | 3.00 | A | 2.33 | 0.02 |                          |
| fabZ  | (3R)-hydroxymyristoyl ACP dehydratase                                     | Endotoxin                                            | 3.41 | A | 2.69 | 0.03 |                          |
| cyaB  | cyclolysin secretion ATP-binding protein                                  | Toxin; Adenylate cyclase; RTX toxin                  | 3.45 | A | 2.65 | 0.00 |                          |
| clbJ  | colibactin non-ribosomal peptide synthetase ClbJ                          | Toxin; Genotoxin                                     | 2.61 | A | 2.10 | 0.00 |                          |
| clbI  | colibactin polyketide synthase ClbI                                       | Toxin; Genotoxin                                     | 2.61 | A | 2.23 | 0.00 |                          |
| clbM  | precolibactin export MATE transporter ClbM                                | Toxin; Genotoxin                                     | 4.34 | A | 3.56 | 0.04 |                          |
| clbL  | colibactin biosynthesis amidase ClbL                                      | Toxin; Genotoxin                                     | 3.14 | A | 2.52 | 0.00 |                          |
| clbS  | colibactin self-protection protein ClbS                                   | Toxin; Genotoxin                                     | 2.80 | A | 2.26 | 0.00 |                          |
| cylR2 | cytolysin regulator R2                                                    | Toxin; Hemolysin/bacteriocin; Biofilm formation      | 3.91 | A | 3.23 | 0.01 |                          |
| toxA  | toxin A                                                                   | Toxin; Intracellular toxin; Glucosyltransferase      | 2.98 | A | 2.50 | 0.00 |                          |
| rtxB  | RTX toxin transporter RtxB                                                | Toxin; RTX toxin; Actin monomer cross-linking        | 3.26 | A | 2.54 | 0.02 |                          |

|          |                                                                                |                                                        |      |   |      |      |                                          |
|----------|--------------------------------------------------------------------------------|--------------------------------------------------------|------|---|------|------|------------------------------------------|
|          |                                                                                | activity                                               |      |   |      |      |                                          |
| rtxA     | RTX toxin RtxA                                                                 | Toxin; RTX toxin; Actin monomer cross-linking activity | 2.58 | A | 2.18 | 0.01 |                                          |
| mucD     | serine protease MucD precursor                                                 | None                                                   | 3.55 | A | 2.75 | 0.01 | Others (3)                               |
| mbtJ     | Putative acetyl hydrolase MbtJ                                                 | None                                                   | 2.82 | A | 2.18 | 0.03 |                                          |
| CBU_1434 | Coxiella Dot/Icm type IVB secretion system translocated effector               | Secretion system; Type IVBsecretion system             | 3.35 | A | 2.55 | 0.04 |                                          |
| IlpA     | immunogenic lipoprotein A                                                      | Adherence                                              | 3.37 | C | 2.60 | 0.03 | Colonization, adherece and invasion (73) |
| focA     | F1C major fimbrial subunit precursor                                           | Adherence                                              | 2.47 | C | 2.06 | 0.01 |                                          |
| lap      | Listeria adhesion protein Lap                                                  | Adherence                                              | 4.01 | C | 3.20 | 0.00 |                                          |
| pebA     | bifunctional adhesin/ABC transporter aspartate/glutamate-binding protein       | Adherence                                              | 3.83 | C | 3.20 | 0.00 |                                          |
| cna      | collagen adhesin precursor                                                     | Adherence                                              | 3.04 | C | 2.75 | 0.00 |                                          |
| papX     | PapX protein regulates flagellum synthesis to repress motility                 | Adherence                                              | 2.96 | C | 2.38 | 0.00 |                                          |
| pilC     | still frameshift type 4 fimbrial biogenesis protein PilC                       | Adherence                                              | 2.80 | C | 2.10 | 0.03 |                                          |
| pilD     | type IV pilus prepilin peptidase                                               | Adherence                                              | 2.78 | C | 2.27 | 0.05 |                                          |
| lmb      | laminin-binding surface protein                                                | Adherence                                              | 2.75 | C | 2.02 | 0.01 |                                          |
| cbpD     | choline binding protein D                                                      | Adherence                                              | 2.67 | C | 2.15 | 0.01 |                                          |
| papC     | usher protein PapC                                                             | Adherence                                              | 2.61 | C | 2.17 | 0.01 |                                          |
| pilV     | type IV pilus biogenesis protein PilV                                          | Adherence                                              | 2.49 | C | 2.11 | 0.02 |                                          |
| acfD     | accessory colonization factor AcfD                                             | Adherence                                              | 2.46 | C | 2.13 | 0.00 |                                          |
| spaG     | SpaH-type pili minorsubunit SpaG, pilus tip protein                            | Adherence                                              | 2.68 | C | 2.29 | 0.00 |                                          |
| yapC     | autotransporter protein YapC                                                   | Adherence; Autotransporter                             | 3.11 | C | 2.66 | 0.01 |                                          |
| badA     | Surface protein/Bartonella adhesin BadA                                        | Adherence; Autotransporter                             | 2.84 | C | 2.36 | 0.02 |                                          |
| icaB     | N-deacetylase, involved in polysaccharide intercellular adhesin(PIA) synthesis | Adherence; Biofilm formation                           | 2.86 | C | 2.37 | 0.00 |                                          |
| esp      | Enterococcal surface protein; Esp                                              | Adherence; Biofilm formation                           | 2.48 | C | 2.14 | 0.02 |                                          |
| msbA     | lipid transporter ATP-binding/permease                                         | Adherence; Endotoxin                                   | 3.97 | C | 3.08 | 0.02 |                                          |

|      |                                                  |                                              |      |   |      |      |
|------|--------------------------------------------------|----------------------------------------------|------|---|------|------|
| rfaE | ADP-heptose synthase                             | Adherence; Endotoxin                         | 3.39 | C | 2.66 | 0.00 |
| fimD | usher protein FimD                               | Adherence; Fimbrial                          | 3.08 | C | 2.47 | 0.05 |
| lpfA | long polar fimbria protein LpfA                  | Adherence; Fimbrial                          | 2.78 | C | 2.42 | 0.00 |
| csgC | curli assembly protein CsgC                      | Adherence; Fimbrial                          | 2.57 | C | 2.12 | 0.01 |
| csgF | curli production assembly/transport protein CsgF | Adherence; Fimbrial                          | 2.47 | C | 2.03 | 0.01 |
| oapA | opacity associated protein (oapA)                | Adherence; Nonfimbrial structure             | 2.81 | C | 2.23 | 0.04 |
| shdA | AIDA autotransporter-like protein                | Adherence; Nonfimbrial; Autotransporter      | 3.05 | C | 2.65 | 0.02 |
| misL | putative autotransporter                         | Adherence; Nonfimbrial; Autotransporter      | 2.59 | C | 2.17 | 0.01 |
| ompU | outer membrane protein OmpU                      | Adherence; Porin; Immunostimulatory molecule | 3.15 | C | 2.58 | 0.03 |
| pilB | major subunit PilB                               | Adherence; Sortase-assembled pili            | 2.92 | C | 2.46 | 0.00 |
| tapD | prepilin peptidase, pilD-like                    | Adherence; Type IV pili                      | 3.07 | C | 2.42 | 0.04 |
| tapT | twitching ATPase                                 | Adherence; Type IV pili                      | 2.80 | C | 2.27 | 0.01 |
| tapM | type IV pilus assembly protein PilM              | Adherence; Type IV pili                      | 2.65 | C | 2.23 | 0.00 |
| tapQ | type IV pilus secretin PilQ                      | Adherence; Type IV pili                      | 2.63 | C | 2.06 | 0.05 |
| fliQ | flagellar biosynthetic protein FliQ              | Secretion system; Invasion; Motility         | 3.18 | C | 2.71 | 0.01 |
| flgM | negative regulator of flagellin synthesis        | Secretion system; Invasion; Motility         | 3.07 | C | 2.65 | 0.01 |
| fliE | flagellar hook-basal body complex protein FliE   | Secretion system; Invasion; Motility         | 3.01 | C | 2.43 | 0.02 |
| flgC | flagellar basal-body rod protein FlgC            | Secretion system; Invasion; Motility         | 3.00 | C | 2.49 | 0.01 |
| flgB | flagellar basal body rod protein FlgB            | Secretion system; Invasion; Motility         | 2.94 | C | 2.37 | 0.01 |



|      |                                                       |                                      |      |   |      |      |
|------|-------------------------------------------------------|--------------------------------------|------|---|------|------|
| cheB | chemotaxis-specific methyltransferase                 | Secretion system; Invasion; Motility | 2.92 | C | 2.37 | 0.00 |
| fliN | flagellar motor switch protein FliN                   | Secretion system; Invasion; Motility | 2.89 | C | 2.38 | 0.00 |
| flgG | flagellar basal body rod protein FlgG                 | Secretion system; Invasion; Motility | 2.80 | C | 2.17 | 0.03 |
| fliS | flagellar protein FliS                                | Secretion system; Invasion; Motility | 2.75 | C | 2.16 | 0.04 |
| flhE | flagellar biosynthesis protein FlhE                   | Secretion system; Invasion; Motility | 2.72 | C | 2.25 | 0.01 |
| fliT | flagellar protein FliT                                | Secretion system; Invasion; Motility | 2.71 | C | 2.25 | 0.00 |
| fliF | flagellar M-ring protein FliF                         | Secretion system; Invasion; Motility | 2.69 | C | 2.18 | 0.00 |
| fliP | flagellar biosynthesis protein FliP                   | Secretion system; Invasion; Motility | 2.69 | C | 2.18 | 0.01 |
| fliJ | flagellar protein FliJ                                | Secretion system; Invasion; Motility | 2.67 | C | 2.23 | 0.01 |
| fliL | flagellar basal body protein FliL                     | Secretion system; Invasion; Motility | 2.66 | C | 2.21 | 0.01 |
| flhD | flagellar transcriptional activator FlhD              | Secretion system; Invasion; Motility | 2.62 | C | 2.16 | 0.01 |
| flgA | flagellar basal body P-ring biosynthesis protein FlgA | Secretion system; Invasion; Motility | 2.61 | C | 2.23 | 0.00 |
| fliM | flagellar motor switch protein FliM                   | Secretion system; Invasion; Motility | 2.60 | C | 2.03 | 0.01 |
| flgI | flagellar P-ring protein precursor FlgI               | Secretion system; Invasion; Motility | 2.60 | C | 2.18 | 0.00 |
| flgF | flagellar basal-body rod protein                      | Secretion system; Invasion; Motility | 2.59 | C | 2.14 | 0.00 |

|         |                                                                         |                                            |      |   |      |      |                        |
|---------|-------------------------------------------------------------------------|--------------------------------------------|------|---|------|------|------------------------|
| flgN    | flagella synthesis protein FlgN                                         | Secretion system; Invasion; Motility       | 2.57 | C | 2.12 | 0.01 |                        |
| flgE    | flagellar hook protein FlgE                                             | Secretion system; Invasion; Motility       | 2.57 | C | 2.06 | 0.00 |                        |
| flaN    | flagellar synthesis regulator FlaN                                      | Motility                                   | 2.98 | C | 2.32 | 0.00 |                        |
| fliI    | flagellum-specific ATP synthase FliI                                    | Motility                                   | 2.95 | C | 2.37 | 0.00 |                        |
| fliO    | flagellar biosynthesis protein, FliO                                    | Motility                                   | 2.90 | C | 2.45 | 0.00 |                        |
| flhB    | flagellar protein FlhB                                                  | Motility                                   | 2.80 | C | 2.24 | 0.01 |                        |
| flgD    | flagellar hook capping protein                                          | Motility                                   | 2.75 | C | 2.21 | 0.01 |                        |
| bcfD    | fimbrial adhesin protein                                                | Motility                                   | 2.55 | C | 2.16 | 0.00 |                        |
| bcfA    | fimbrial subunit                                                        | Motility                                   | 2.47 | C | 2.04 | 0.00 |                        |
| bcfE    | fimbrial subunit                                                        | Motility                                   | 2.68 | C | 2.16 | 0.04 |                        |
| lafK    | two-component system lateral flagellar response regulator               | Motility; Colonization                     | 2.87 | C | 2.37 | 0.01 |                        |
| lfhA    | lateral flagellar biosynthesis protein                                  | Motility; Colonization                     | 2.65 | C | 2.21 | 0.01 |                        |
| lafU    | LafU, chemotaxis protein                                                | Motility; Colonization                     | 2.51 | C | 2.07 | 0.00 |                        |
| lfiE    | lateral flagellar hook basal body protein, LfiE                         | Motility; Colonization                     | 2.45 | C | 2.12 | 0.02 |                        |
| fliG    | flagellar motor switch protein G                                        | Motility                                   | 2.72 | C | 2.20 | 0.01 |                        |
| rck     | resistance to complement killing                                        | Serum resistance; Adherence; Invasion      | 3.03 | C | 2.68 | 0.00 |                        |
| lpeA    | lipoprotein promoting cell invasion                                     | Invasion                                   | 2.80 | C | 2.22 | 0.03 |                        |
| mrkJ    | phosphodiesterase                                                       | Biofilm formation                          | 2.64 | C | 2.07 | 0.05 |                        |
| bopD    | sugar-binding transcriptional regulator, LacI family                    | Biofilm formation                          | 4.32 | C | 3.69 | 0.00 |                        |
| ureG    | urease accessory protein (ureG)                                         | Enzyme; Acid resistance; Colonization      | 3.11 | C | 2.49 | 0.01 |                        |
| coxH2   | Coxiella Dot/Icm type IVB secretion system translocated effector        | Secretion system; Type IV secretion system | 3.50 | C | 2.72 | 0.01 | Anti-phagocytosis (18) |
| lpg0257 | Dot/Icm type IV secretion system effector                               | Secretion system; Type IV secretion system | 3.25 | C | 2.74 | 0.02 |                        |
| dotD    | Dot/Icm type IV secretion system outer membrane subcomplex protein DotD | Secretion system; Type IV secretion system | 2.75 | C | 2.28 | 0.04 |                        |

|           |                                                                                                  |                                                      |      |   |      |      |           |
|-----------|--------------------------------------------------------------------------------------------------|------------------------------------------------------|------|---|------|------|-----------|
| icmP_dotM | Dot/Icm type IV secretion system protein IcmP/DotM                                               | Secretion system; Type IV secretion system           | 2.52 | C | 2.11 | 0.01 |           |
| cdsN      | Type III secretion system ATPase                                                                 | Secretion system; Type III secretion system          | 3.03 | C | 2.44 | 0.03 |           |
| cdsD      | Type III secretion system inner membrane ring complex protein CdsD                               | Secretion system; Type III secretion system          | 2.71 | C | 2.27 | 0.02 |           |
| dotC      | Type IVB secretion system protein DotC, outer membrane lipoprotein of core-transmembrane complex | Secretion system; Type IV secretion system; Type IVb | 2.56 | C | 2.13 | 0.01 |           |
| dotB      | Type IVB secretion system Dot/Icm ATPase DotB                                                    | Secretion system; Type IV secretion system; Type IVb | 2.52 | C | 2.09 | 0.02 |           |
| AHA_1846  | Type VI secretion system protein                                                                 | Secretion system; Type VI secretion system           | 2.79 | C | 2.35 | 0.01 |           |
| vgrG      | VgrG protein                                                                                     | Secretion system; Type VI secretion system           | 2.70 | C | 2.29 | 0.02 |           |
| AHA_1843  | Type VI secretion system protein                                                                 | Secretion system; Type VI secretion system           | 2.54 | C | 2.08 | 0.03 |           |
| eccCa1    | ESX-1 type VII secretion system FtsK/SpoIIIE family protein EccCa1                               | Secretion system; Type VII secretion system          | 2.51 | C | 2.21 | 0.03 |           |
| wcbR      | capsular polysaccharide biosynthesis fatty acid synthase                                         | Antiphagocytosis                                     | 2.95 | C | 2.31 | 0.03 |           |
| hasC      | UDP-glucose pyrophosphorylase                                                                    | Antiphagocytosis; Adherence; Tissue invasion         | 3.43 | C | 2.52 | 0.01 |           |
| gnd       | 6-phosphogluconate dehydrogenase                                                                 | Antiphagocytosis; Serum resistance                   | 3.35 | C | 2.66 | 0.00 |           |
| cps4A     | capsular polysaccharide biosynthesis protein Cps4A                                               | Antiphagocytosis; Serum resistance                   | 2.99 | C | 2.30 | 0.04 |           |
| wcaG      | GDP-fucose synthetase                                                                            | Antiphagocytosis; Serum resistance                   | 2.55 | C | 2.09 | 0.01 |           |
| manB      | phosphomannomutase                                                                               | None                                                 | 3.02 | C | 2.43 | 0.00 |           |
| entB      | 2,3-dihydro-2,3-dihydroxybenzoate synthetase, isochroismatase                                    | Iron acquisition; Siderophore                        | 3.23 | C | 2.71 | 0.02 | Nutrition |
| fepD      | iron-enterobactin transporter membrane protein                                                   | Iron acquisition; Siderophore                        | 3.15 | C | 2.62 | 0.01 | uptake,   |

|             |                                                                                        |                               |      |   |      |      |                        |                          |
|-------------|----------------------------------------------------------------------------------------|-------------------------------|------|---|------|------|------------------------|--------------------------|
| fepG        | iron-enterobactin transporter permease                                                 | Iron acquisition; Siderophore | 2.80 | C | 2.29 | 0.02 | growth and spread (24) |                          |
| fbpC        | iron(III) ABC transporter, ATP-binding protein                                         | Iron uptake; ABC transporter  | 4.62 | C | 3.86 | 0.00 |                        |                          |
| hitC        | iron(III) ABC transporter, ATP-binding protein                                         | Iron uptake; ABC transporter  | 4.48 | C | 3.57 | 0.01 |                        |                          |
| shuV        | ATP-binding component of hemin transport system                                        | Iron uptake; Heme uptake      | 3.25 | C | 2.53 | 0.03 |                        |                          |
| chuT        | periplasmic heme-binding protein ChuT                                                  | Iron uptake; Heme uptake      | 2.93 | C | 2.28 | 0.03 |                        |                          |
| entE        | non-ribosomal peptide synthetase adenylate-forming enzyme of acinetobactin synthesis   | Iron uptake; Siderophore      | 3.36 | C | 2.52 | 0.03 |                        |                          |
| entD        | phosphopantetheinyl transferase component of enterobactin synthase multienzyme complex | Iron uptake; Siderophore      | 2.91 | C | 2.35 | 0.05 |                        |                          |
| entC        | isochorismate synthase 1                                                               | Iron uptake; Siderophore      | 2.77 | C | 2.27 | 0.01 |                        |                          |
| barB        | siderophore efflux system of the ABC superfamily                                       | Iron uptake; Siderophore      | 2.49 | C | 2.07 | 0.00 |                        |                          |
| ybtS        | salicylate synthase Irp9                                                               | Iron uptake; Siderophore      | 3.05 | C | 2.15 | 0.03 |                        |                          |
| lipF        | Probable esterase/lipase LipF                                                          | Metabolic adaptation          | 2.94 | C | 2.28 | 0.03 |                        |                          |
| allR        | DNA-binding transcriptional repressor AllR                                             | Nutritional factor            | 3.57 | C | 2.98 | 0.01 |                        |                          |
| allD        | ureidoglycolate dehydrogenase                                                          | Nutritional factor            | 3.22 | C | 2.59 | 0.02 |                        |                          |
| allA        | ureidoglycolate hydrolase                                                              | Nutritional factor            | 2.60 | C | 2.06 | 0.03 |                        |                          |
| msrA_B_pilB | trifunctional thioredoxin/methionine sulfoxide reductase A/B protein                   | Stress protein                | 3.45 | C | 2.70 | 0.03 |                        |                          |
| lplA1       | lipoate protein ligase                                                                 | Intracellular growth          | 3.05 | C | 2.30 | 0.01 |                        |                          |
| irtB        | Iron-regulated transporter IrtB                                                        | Iron-regulated                | 2.92 | C | 2.37 | 0.00 |                        |                          |
| entS        | enterobactin exporter, iron-regulated                                                  | Iron-regulated                | 2.66 | C | 2.23 | 0.01 |                        |                          |
| icl         | Isocitrate lyase Icl (isocitrase) (isocitratase)                                       | Metabolic adaptation          | 3.04 | C | 2.52 | 0.01 |                        |                          |
| cheD        | methyl-accepting chemotaxis protein CheD                                               | chemotaxis                    | 3.41 | C | 2.84 | 0.01 |                        |                          |
| cheR        | chemotaxis methyltransferase CheR                                                      | chemotaxis                    | 2.66 | C | 2.14 | 0.00 |                        |                          |
| cheZ        | chemotaxis regulator CheZ                                                              | chemotaxis                    | 2.50 | C | 2.05 | 0.00 |                        |                          |
| fabZ        | (3R)-hydroxymyristoyl ACP dehydratase                                                  | Endotoxin                     | 3.28 | C | 2.34 | 0.05 |                        | Toxin and endotoxin (12) |
| wbpL        | undecaprenyl-phosphate alpha-N-acetylglucosaminyltransferase                           | Endotoxin                     | 2.99 | C | 2.29 | 0.00 |                        |                          |
| bplB        | probable acetyltransferase                                                             | Endotoxin                     | 2.96 | C | 2.38 | 0.03 |                        |                          |
| pgm         | phosphoglucomutase                                                                     | Endotoxin                     | 2.82 | C | 2.36 | 0.01 |                        |                          |

|           |                                                                                    |                                                    |      |   |      |      |                                                |
|-----------|------------------------------------------------------------------------------------|----------------------------------------------------|------|---|------|------|------------------------------------------------|
| wzz       | positive regulator for alginate biosynthesis MucC                                  | Endotoxin                                          | 2.80 | C | 2.34 | 0.01 |                                                |
| wbpB      | lipopolysaccharide biosynthesis protein                                            | Endotoxin                                          | 2.66 | C | 2.02 | 0.01 |                                                |
| cyaB      | cyclolysin secretion ATP-binding protein                                           | Toxin; Adenylate cyclase;<br>RTX toxin             | 3.41 | C | 2.54 | 0.01 |                                                |
| clbB      | colibactin hybrid non-ribosomal peptide synthetase/type I polyketide synthase ClbB | Toxin; Genotoxin                                   | 3.50 | C | 2.86 | 0.02 |                                                |
| clbD      | colibactin biosynthesis dehydrogenase ClbD                                         | Toxin; Genotoxin                                   | 3.29 | C | 2.63 | 0.01 |                                                |
| clbL      | colibactin biosynthesis amidase ClbL                                               | Toxin; Genotoxin                                   | 3.16 | C | 2.66 | 0.01 |                                                |
| clbA      | colibactin biosynthesis phosphopantetheinyl transferase ClbA                       | Toxin; Genotoxin                                   | 3.02 | C | 2.48 | 0.00 |                                                |
| toxA      | toxin A                                                                            | Toxin; Intracellular toxin;<br>Glucosyltransferase | 2.79 | C | 2.25 | 0.03 |                                                |
| gspE      | general secretion pathway protein E                                                | Secretion system; Type II secretion system         | 2.81 | C | 2.18 | 0.03 | Others (13)                                    |
| gspK      | general secretion pathway protein K                                                | Secretion system; Type II secretion system         | 2.60 | C | 2.20 | 0.04 |                                                |
| gspL      | general secretion pathway protein L                                                | Secretion system; Type II secretion system         | 2.45 | C | 2.03 | 0.02 |                                                |
| espX4     | Type III secretion system effector EspX4                                           | Type III secretion system                          | 2.53 | C | 2.11 | 0.04 |                                                |
| pilQ      | type IV pilus secretin protein PilQ                                                | Type IV secretion system                           | 2.49 | C | 2.05 | 0.02 |                                                |
| etgA      | T3SS-associated peptidoglycan lytic enzyme                                         | Type III secretion system                          | 2.77 | C | 2.30 | 0.01 |                                                |
| pilM      | type IV pilus inner membrane platform protein PilM                                 | Type IV secretion system                           | 2.69 | C | 2.25 | 0.00 |                                                |
| pvdH      | diaminobutyrate-2-oxoglutarate aminotransferase PvdH                               | None                                               | 3.78 | C | 2.81 | 0.04 |                                                |
| mucD      | serine protease MucD precursor                                                     | None                                               | 3.52 | C | 2.63 | 0.01 |                                                |
| fleQ_flrC | FleQ protein                                                                       | None                                               | 3.04 | C | 2.31 | 0.04 |                                                |
| phzF1     | phenazine biosynthesis protein PhzF, isomerase                                     | None                                               | 2.76 | C | 2.17 | 0.02 |                                                |
| mbtJ      | Putative acetyl hydrolase MbtJ                                                     | None                                               | 2.68 | C | 2.01 | 0.04 |                                                |
| icsA_virG | autotransporter, actin tail assembly protein IcsA/VirG                             | None                                               | 2.52 | C | 2.13 | 0.01 |                                                |
| lap       | Listeria adhesion protein Lap                                                      | Adherence                                          | 3.97 | D | 3.03 | 0.02 | Colonization,<br>adherece and<br>invasion (14) |
| lmb       | laminin-binding surface protein                                                    | Adherence                                          | 2.78 | D | 2.05 | 0.01 |                                                |
| p97       | protein p97; cilium adhesin                                                        | Adherence                                          | 2.62 | D | 2.16 | 0.04 |                                                |

|       |                                                                    |                                              |      |   |      |      |  |                        |
|-------|--------------------------------------------------------------------|----------------------------------------------|------|---|------|------|--|------------------------|
| pilT  | twitching motility protein PilT                                    | Adherence                                    | 2.81 | D | 2.08 | 0.01 |  |                        |
| pce   | choline binding protein E                                          | Adherence                                    | 3.04 | D | 2.37 | 0.03 |  |                        |
| msbA  | lipid transporter ATP-binding/permease                             | Adherence; Endotoxin                         | 3.97 | D | 3.09 | 0.01 |  |                        |
| sipA  | signal peptidase I                                                 | Adherence; Sortase-assembled pili            | 3.30 | D | 2.67 | 0.02 |  |                        |
| gtcA  | wall teichoic acid glycosylation protein GtcA                      | Invasion                                     | 2.99 | D | 2.42 | 0.03 |  |                        |
| flhF  | flagellar biosynthesis protein                                     | Secretion system; Invasion; Motility         | 3.57 | D | 2.48 | 0.03 |  |                        |
| fleN  | flagellar synthesis regulator FleN                                 | Secretion system; Invasion; Motility         | 2.97 | D | 2.29 | 0.00 |  |                        |
| fliO  | flagellar biosynthesis protein, FliO                               | Secretion system; Invasion; Motility         | 2.68 | D | 2.11 | 0.03 |  |                        |
| fliI  | flagellum-specific ATP synthase FliI                               | Secretion system; Invasion; Motility         | 2.91 | D | 2.23 | 0.01 |  |                        |
| cheB  | chemotaxis-specific methylsterase                                  | Secretion system; Invasion; Motility         | 2.81 | D | 2.13 | 0.01 |  |                        |
| fliB  | flagellin lysine-N-methylase                                       | Secretion system; Invasion; Motility         | 2.80 | D | 2.05 | 0.05 |  |                        |
| wcbQ  | capsular polysaccharide biosynthesis transmembrane protein         | Antiphagocytosis                             | 3.00 | D | 2.41 | 0.01 |  | Anti-phagocytosis (13) |
| hasC  | UDP-glucose pyrophosphorylase                                      | Antiphagocytosis; Adherence; Tissue invasion | 3.45 | D | 2.51 | 0.01 |  |                        |
| cps4A | capsular polysaccharide biosynthesis protein Cps4A                 | Antiphagocytosis; Serum resistance           | 3.07 | D | 2.50 | 0.00 |  |                        |
| cps4B | capsular polysaccharide biosynthesis protein Cps4B                 | Antiphagocytosis; Serum resistance           | 2.72 | D | 2.14 | 0.01 |  |                        |
| cpsC  | teichoic acid biosynthesis protein, putative                       | Antiphagocytosis; Serum resistance           | 2.81 | D | 2.16 | 0.02 |  |                        |
| yscN  | type III secretion system ATPase YscN                              | Secretion system; Type III secretion system  | 3.01 | D | 2.32 | 0.04 |  |                        |
| cdsD  | Type III secretion system inner membrane ring complex protein CdsD | Secretion system; Type III                   | 2.64 | D | 2.15 | 0.01 |  |                        |

|         |                                                                  |                                             |      |   |      |      |                                          |
|---------|------------------------------------------------------------------|---------------------------------------------|------|---|------|------|------------------------------------------|
|         |                                                                  | secretion system                            |      |   |      |      |                                          |
| cdsN    | Type III secretion system ATPase                                 | Secretion system; Type III secretion system | 3.06 | D | 2.51 | 0.00 |                                          |
| coxH2   | Coxiella Dot/Icm type IVB secretion system translocated effector | Secretion system; Type IV secretion system  | 3.46 | D | 2.48 | 0.02 |                                          |
| manB    | phosphomannomutase                                               | None                                        | 2.93 | D | 2.20 | 0.04 |                                          |
| galE    | UDP-glucose 4-epimerase                                          | None                                        | 3.37 | D | 2.40 | 0.05 |                                          |
| lpg2936 | Dot/Icm type IV secretion system effector                        | Secretion system; Type IV secretion system  | 3.34 | D | 2.37 | 0.03 |                                          |
| lspA    | signal peptidase II                                              | Peptidase                                   | 3.32 | D | 2.56 | 0.00 |                                          |
| irtB    | Iron-regulated transporter IrtB                                  | Iron regulation                             | 2.87 | D | 2.25 | 0.00 | Nutrition uptake, growth and spread (13) |
| ideR    | Iron-dependent repressor and activator IdeR                      | Iron regulation                             | 3.46 | D | 2.75 | 0.01 |                                          |
| fbpC    | iron(III) ABC transporter, ATP-binding protein                   | Iron uptake; ABC transporter                | 4.56 | D | 3.61 | 0.01 |                                          |
| hitC    | iron(III) ABC transporter, ATP-binding protein                   | Iron uptake; ABC transporter                | 4.45 | D | 3.41 | 0.04 |                                          |
| feoA    | ferrous iron transporter A                                       | Iron uptake; Ferrous iron uptake            | 3.70 | D | 2.78 | 0.04 |                                          |
| srtB    | NPQTN specific sortase B                                         | Iron uptake; Heme uptake                    | 3.00 | D | 2.40 | 0.04 |                                          |
| chuW    | Putative oxygen independent coproporphyrinogen III oxidase       | Iron uptake; Heme uptake                    | 3.56 | D | 2.49 | 0.02 |                                          |
| barA    | siderophore efflux system of the ABC superfamily                 | Iron uptake; Siderophore                    | 2.64 | D | 2.04 | 0.01 |                                          |
| mgtB    | Mg <sup>2+</sup> transport protein                               | Magnesium uptake                            | 4.00 | D | 2.86 | 0.02 |                                          |
| lipF    | Probable esterase/lipase LipF                                    | Metabolic adaptation                        | 2.94 | D | 2.18 | 0.02 |                                          |
| ppkA    | serine/threonine protein kinase PpkA                             | Secretion system; Type VI secretion system  | 3.49 | D | 2.78 | 0.03 |                                          |
| pppA    | Pseudomonas protein phosphatase PppA                             | Secretion system; Type VI secretion system  | 3.26 | D | 2.62 | 0.01 |                                          |
| allB    | allantoinase                                                     | Nutritional factor                          | 3.52 | D | 2.61 | 0.01 |                                          |
| eccA1   | ESX-1 type VII secretion system AAA+ ATPase EccA1                | Secretion system; Type VII secretion system | 3.13 | D | 2.62 | 0.03 | Toxin/<br>endotoxin/                     |

|      |                                                                    |                                                 |      |   |      |      |            |
|------|--------------------------------------------------------------------|-------------------------------------------------|------|---|------|------|------------|
| essC | type VII secretion system protein EssC, FtsK/SpoIIIE family ATPase | Secretion system; Type VII secretion system     | 3.39 | D | 2.59 | 0.00 | (9)        |
| bplB | probable acetyltransferase                                         | Endotoxin                                       | 2.91 | D | 2.19 | 0.02 |            |
| lpxE | phosphatidylglycerophosphatase B                                   | Endotoxin                                       | 2.91 | D | 2.25 | 0.02 |            |
| fabZ | (3R)-hydroxymyristoyl ACP dehydratase                              | Endotoxin                                       | 3.37 | D | 2.60 | 0.01 |            |
| cyaB | cyclolysin secretion ATP-binding protein                           | Toxin; Adenylate cyclase; RTX toxin             | 3.41 | D | 2.54 | 0.00 |            |
| clbA | colibactin biosynthesis phosphopantetheinyl transferase ClbA       | Toxin; Genotoxin                                | 2.86 | D | 2.08 | 0.04 |            |
| clbL | colibactin biosynthesis amidase ClbL                               | Toxin; Genotoxin                                | 3.02 | D | 2.32 | 0.00 |            |
| toxA | toxin A                                                            | Toxin; Intracellular toxin; Glucosyltransferase | 2.83 | D | 2.32 | 0.00 |            |
| mbtJ | Putative acetyl hydrolase MbtJ                                     | None                                            | 2.73 | D | 2.12 | 0.01 | Others (3) |
| mucD | serine protease MucD precursor                                     | None                                            | 3.49 | D | 2.51 | 0.00 |            |
| srtD | fimbrial associated sortase                                        | None                                            | 2.72 | D | 2.19 | 0.04 |            |



**Table S6 Enriched CAZy families in groups using LefSe analysis**

| <b>Taxa</b>     | <b>Abundance</b> | <b>Group</b> | <b>LDA score</b> | <b>p value</b> |
|-----------------|------------------|--------------|------------------|----------------|
| L1_AA L2_AA6    | 3.4147598        | A            | 2.681804         | 0.017097       |
| L1_CBM L2_CBM14 | 3.5284175        | A            | 2.661391         | 0.008266       |
| L1_CBM L2_CBM2  | 3.598018         | A            | 2.779788         | 0.022486       |
| L1_CBM L2_CBM22 | 2.7715603        | A            | 2.142679         | 0.022486       |
| L1_CBM L2_CBM48 | 3.773349         | A            | 2.957323         | 0.004425       |
| L1_CBM L2_CBM50 | 4.7293339        | A            | 3.976684         | 0.004425       |
| L1_CBM L2_CBM65 | 2.659728         | A            | 2.188461         | 0.029295       |
| L1_CBM L2_CBM79 | 2.3574847        | A            | 2.0065           | 0.005602       |
| L1_CE L2_CE4    | 3.9511105        | A            | 2.81352          | 0.005192       |
| L1_GH L2_GH112  | 2.90678          | A            | 2.483135         | 0.002279       |
| L1_GH L2_GH120  | 2.5406368        | A            | 2.015571         | 0.007096       |
| L1_GH L2_GH17   | 3.3754136        | A            | 2.711946         | 0.011134       |
| L1_GH L2_GH42   | 3.6692895        | A            | 2.903192         | 0.014855       |
| L1_GH L2_GH45   | 2.8305806        | A            | 2.357838         | 0.025696       |
| L1_GH L2_GH65   | 3.9179201        | A            | 2.949775         | 0.008266       |
| L1_GH L2_GH71   | 3.2779808        | A            | 2.561341         | 0.017097       |
| L1_GH L2_GH72   | 3.5436616        | A            | 2.424103         | 0.025696       |
| L1_GH L2_GH75   | 2.7924613        | A            | 2.403161         | 0.011079       |
| L1_GH L2_GH77   | 3.4046038        | A            | 2.680436         | 0.003762       |
| L1_GT L2_GT28   | 4.0239066        | A            | 2.838902         | 0.019631       |
| L1_GT L2_GT29   | 3.2766813        | A            | 2.270991         | 0.004425       |
| L1_GT L2_GT34   | 3.0414208        | A            | 2.353563         | 0.019631       |
| L1_GT L2_GT47   | 3.3301458        | A            | 2.475269         | 0.001611       |
| L1_GT L2_GT5    | 4.0108868        | A            | 3.153132         | 0.005192       |
| L1_GT L2_GT60   | 2.4978247        | A            | 2.107092         | 0.006077       |
| L1_GT L2_GT66   | 3.602778         | A            | 2.563            | 0.012876       |
| L1_GT L2_GT7    | 3.2163769        | A            | 2.01935          | 0.048341       |
| L1_GT L2_GT80   | 3.258821         | A            | 2.392674         | 0.007096       |
| L1_GT L2_GT96   | 3.0189927        | A            | 2.280846         | 0.025696       |
| L1_AA L2_AA1    | 3.0202291        | C            | 2.429022         | 0.01703        |
| L1_AA L2_AA2    | 2.5925808        | C            | 2.024115         | 0.015611       |
| L1_AA L2_AA4    | 3.0293562        | C            | 2.399438         | 0.002257       |
| L1_CE L2_CE16   | 2.9168885        | C            | 2.368433         | 0.025947       |
| L1_GH L2_GH1    | 4.0983551        | C            | 3.317108         | 0.003423       |
| L1_GH L2_GH103  | 3.075738         | C            | 2.490823         | 0.009968       |
| L1_GH L2_GH111  | 2.5091502        | C            | 2.109421         | 0.001466       |
| L1_GH L2_GH135  | 2.9596041        | C            | 2.288439         | 0.045038       |
| L1_GH L2_GH32   | 4.2460266        | C            | 3.275436         | 0.038647       |
| L1_GH L2_GH42   | 3.8699339        | C            | 3.328509         | 0.000413       |
| L1_GH L2_GH47   | 3.1175657        | C            | 2.357313         | 0.010923       |
| L1_GH L2_GH53   | 3.947162         | C            | 3.079726         | 0.033044       |
| L1_GH L2_GH65   | 3.9192715        | C            | 3.00999          | 0.001466       |

|                   |           |   |          |          |
|-------------------|-----------|---|----------|----------|
| L1__GH L2__GH71   | 3.1661979 | C | 2.204436 | 0.028151 |
| L1__GH L2__GH73   | 3.9774757 | C | 2.986905 | 0.028151 |
| L1__GH L2__GH84   | 3.3232936 | C | 2.352775 | 0.041739 |
| L1__GH L2__GH93   | 3.4774043 | C | 2.536555 | 0.045038 |
| L1__GT L2__GT20   | 3.355823  | C | 2.510907 | 0.021985 |
| L1__GT L2__GT22   | 3.3048956 | C | 2.720892 | 0.025947 |
| L1__GT L2__GT34   | 3.0367053 | C | 2.328916 | 0.001635 |
| L1__GT L2__GT39   | 2.8096733 | C | 2.183278 | 0.028151 |
| L1__GT L2__GT4    | 5.0332217 | C | 3.869176 | 0.00379  |
| L1__GT L2__GT5    | 3.9509454 | C | 2.776093 | 0.014298 |
| L1__GT L2__GT51   | 4.3274706 | C | 3.113618 | 0.009968 |
| L1__GT L2__GT57   | 3.2335348 | C | 2.426113 | 0.038647 |
| L1__GT L2__GT77   | 4.0819696 | C | 3.74364  | 0.001822 |
| L1__GT L2__GT87   | 3.525767  | C | 2.868887 | 0.025947 |
| L1__GT L2__GT96   | 3.0106193 | C | 2.264763 | 0.01196  |
| L1__AA L2__AA4    | 2.9106742 | D | 2.193128 | 0.040852 |
| L1__AA L2__AA6    | 3.3918557 | D | 2.631918 | 0.011284 |
| L1__CBM L2__CBM14 | 3.4736032 | D | 2.510871 | 0.019913 |
| L1__CBM L2__CBM48 | 3.7285164 | D | 2.817317 | 0.003504 |
| L1__CBM L2__CBM50 | 4.6020179 | D | 3.307748 | 0.006651 |
| L1__GH L2__GH1    | 4.0515769 | D | 3.228395 | 0.029732 |
| L1__GH L2__GH103  | 2.8909104 | D | 2.161683 | 0.027852 |
| L1__GH L2__GH111  | 2.4933755 | D | 2.060189 | 0.000273 |
| L1__GH L2__GH112  | 2.7621574 | D | 2.299969 | 0.001039 |
| L1__GH L2__GH13   | 4.4151854 | D | 3.26698  | 0.016166 |
| L1__GH L2__GH23   | 4.5252398 | D | 3.444768 | 0.038382 |
| L1__GH L2__GH42   | 3.6840028 | D | 2.969879 | 0.002507 |
| L1__GH L2__GH65   | 3.8919401 | D | 2.861082 | 0.018587 |
| L1__GH L2__GH71   | 3.2744236 | D | 2.600246 | 0.010482 |
| L1__GH L2__GH72   | 3.5333219 | D | 2.420744 | 0.046198 |
| L1__GH L2__GH73   | 4.0360205 | D | 3.216496 | 0.002302 |
| L1__GH L2__GH77   | 3.3113564 | D | 2.473398 | 0.043456 |
| L1__GT L2__GT29   | 3.2665653 | D | 2.2237   | 0.006152 |
| L1__GT L2__GT34   | 2.9957952 | D | 2.295566 | 0.009029 |
| L1__GT L2__GT4    | 5.0082065 | D | 3.725325 | 0.043456 |
| L1__GT L2__GT47   | 3.3002298 | D | 2.386333 | 0.013053 |
| L1__GT L2__GT5    | 3.9841039 | D | 3.04319  | 0.003504 |
| L1__GT L2__GT66   | 3.5715695 | D | 2.473304 | 0.040852 |
| L1__GT L2__GT80   | 3.2298032 | D | 2.272254 | 0.029732 |
| L1__GT L2__GT96   | 3.0327675 | D | 2.361024 | 0.006651 |
| L1__CBM L2__CBM12 | 3.1709363 | H | 2.515113 | 0.013153 |
| L1__CBM L2__CBM18 | 3.6513607 | H | 3.252412 | 0.000955 |
| L1__CBM L2__CBM20 | 3.5654186 | H | 2.799938 | 0.028395 |
| L1__CBM L2__CBM27 | 2.6127728 | H | 2.142823 | 0.000505 |

---

|                   |           |   |          |          |
|-------------------|-----------|---|----------|----------|
| L1__CBM L2__CBM30 | 1.0948004 | H | 2.149387 | 0.000234 |
| L1__CBM L2__CBM6  | 3.5817938 | H | 2.768732 | 0.001192 |
| L1__CBM L2__CBM66 | 2.6219406 | H | 2.089692 | 0.010991 |
| L1__CBM L2__CBM73 | 2.9459548 | H | 2.551962 | 0.004264 |
| L1__CE L2__CE15   | 2.720007  | H | 2.215194 | 0.018674 |
| L1__CE L2__CE3    | 2.9162844 | H | 2.349855 | 0.042943 |
| L1__CE L2__CE8    | 3.4508578 | H | 2.766252 | 0.005179 |
| L1__GH L2__GH105  | 3.708372  | H | 3.19842  | 0.006739 |
| L1__GH L2__GH106  | 2.965373  | H | 2.512933 | 0.007768 |
| L1__GH L2__GH115  | 3.0314945 | H | 2.556172 | 0.005722 |
| L1__GH L2__GH12   | 3.4195935 | H | 2.853934 | 0.007892 |
| L1__GH L2__GH123  | 2.815602  | H | 2.367925 | 0.028196 |
| L1__GH L2__GH20   | 3.7534189 | H | 3.173442 | 0.015759 |
| L1__GH L2__GH28   | 3.8982696 | H | 3.086083 | 0.001641 |
| L1__GH L2__GH29   | 3.6627967 | H | 3.167579 | 0.026124 |
| L1__GH L2__GH57   | 2.7103967 | H | 2.21255  | 0.037614 |
| L1__GH L2__GH66   | 3.0205814 | H | 2.469979 | 0.013588 |
| L1__GH L2__GH78   | 3.9375491 | H | 3.128304 | 0.009646 |
| L1__GH L2__GH92   | 4.004253  | H | 3.343209 | 0.027455 |
| L1__GH L2__GH95   | 3.5306761 | H | 2.968566 | 0.003415 |
| L1__GH L2__GH97   | 3.5985348 | H | 3.193414 | 0.001689 |
| L1__GT L2__GT23   | 2.7516696 | H | 2.389376 | 0.000918 |
| L1__GT L2__GT3    | 2.5417921 | H | 2.129148 | 0.001984 |
| L1__GT L2__GT30   | 3.6549635 | H | 2.817754 | 0.010201 |
| L1__GT L2__GT32   | 2.9566617 | H | 2.367441 | 0.017216 |
| L1__GT L2__GT83   | 3.5086342 | H | 2.741122 | 0.000882 |
| L1__GT L2__GT90   | 3.9214456 | H | 3.172276 | 0.00045  |
| L1__PL L2__PL10   | 3.0409283 | H | 2.648174 | 0.005659 |
| L1__PL L2__PL14   | 1.301114  | H | 2.158041 | 0.029723 |

---
